# Supplementary material for: An aqueous photo-controlled polymerization under NIR wavelengths: synthesis of polymeric nanoparticles through thick barriers
Source: Chem Sci. 2022 Sep 1;13(39):11519–32. doi: 10.1039/d2sc03952d (PMC9555728; doi:10.1039/d2sc03952d)
Supplement: SC-013-D2SC03952D-s001 [file SC-013-D2SC03952D-s001.pdf]

## Supporting Information

### **An Aqueous Photo-Controlled Polymerization under NIR Wavelengths: Synthesis of Polymeric Nanoparticles through Thick Barriers**

Zilong Wu,<sup>a</sup> Wenbo Fang,<sup>a</sup> Chenyu Wu,<sup>b</sup> Nathaniel Corrigan,<sup>a</sup> Tong Zhang,<sup>a</sup> Sihao Xu,<sup>a</sup> Cyrille Boyer <sup>a,\*</sup>

*a- Cluster for Advanced Macromolecular Design and Australian Centre for NanoMedicine, School of Chemical Engineering, The University of New South Wales, Sydney, NSW 2052, Australia; E-mail: [cboyer@unsw.edu.au](mailto:cboyer@unsw.edu.au)*

*b- Qingdao Institute for Theoretical and Computational Sciences, Institute of Frontier and Interdisciplinary Science, Shandong University, Qingdao 266237 Shandong, P. R. China*

## Contents

|                                                                                                                             |    |
|-----------------------------------------------------------------------------------------------------------------------------|----|
| EXPERIMENTAL SECTION .....                                                                                                  | 3  |
| Materials .....                                                                                                             | 3  |
| Instrumentation .....                                                                                                       | 3  |
| Synthesis of PEG <sub>113</sub> -CDTPA macroRAFT .....                                                                      | 4  |
| Experiments of quenching singlet oxygen ( <sup>1</sup> O <sub>2</sub> ) and superoxide (O <sub>2</sub> <sup>•-</sup> )..... | 4  |
| Homogenous photo-RAFT polymerization .....                                                                                  | 5  |
| Photo-RAFT dispersion polymerization.....                                                                                   | 9  |
| ADDITIONAL RESULTS .....                                                                                                    | 11 |
| DFT CALCULATIONS .....                                                                                                      | 41 |
| Coordinates and energies of photocatalysts .....                                                                            | 41 |
| Coordinates and energies of RAFT, TEOA, and O <sub>2</sub> .....                                                            | 46 |
| REFERENCES.....                                                                                                             | 49 |

## EXPERIMENTAL SECTION

### Materials

*N,N*-dimethylacrylamide (DMA, 99%), *N,N*-diethylacrylamide (DEA, 99%), 2-hydroxyethyl acrylate (HEA, 96%), oligo(ethylene glycol) methyl ether acrylate (OEGA, 99%) ( $M_n = 480 \text{ g mol}^{-1}$ ), and oligo(ethylene glycol) methyl ether methacrylate (OEGMA, 99%) ( $M_n = 300 \text{ g mol}^{-1}$ ) were all purchased from Aldrich and deinhibited by passing through a basic alumina column (Ajax Chemical, AR). 2-Hydroxypropyl methacrylate (HPMA, 97%) was purchased from Aldrich and purified by silica column chromatography using ethyl acetate/hexane (1/8) as the eluent. Zinc tetrasulfonated phthalocyanine ( $\text{ZnPcS}_4$ , 95%) was obtained from phthalocyanine tetrasulfonic acid (Frontier Scientific) neutralized with quantitative sodium bicarbonate ( $\text{NaHCO}_3$ , AR). Thiocarbonylthio compounds (RAFT agents), including 4-cyano-4-[(dodecylsulfanylthiocarbonyl)sulfanyl] pentanoic acid (CDTPA, 97%), 4-(((2-carboxyethyl)thio)carbonothioyl)thio)-4-cyanopentanoic acid (CTCPA, 95%), 2-(Butylthiocarbonothioylthio)propanoic acid (BTPA, 95%) were purchased from Boron Molecular while 2-(dodecylthiocarbonothioylthio)-2-methylpropionic acid (DDMAT, 97%) were purchased from Aldrich. Hydrogen peroxide ( $\text{H}_2\text{O}_2$ , 30 wt% in  $\text{H}_2\text{O}$ ) was purchased from Chem-Supply. 9,10-Dimethylantracene (9,10-DMA, 99%), nitrotetrazolium blue chloride (NBT, 90%), triethanolamine (TEOA, 99%), poly(ethylene glycol) methyl ether ( $\text{PEG}_{113}$ ,  $M_n = 5,000 \text{ g mol}^{-1}$ ), *N,N'*-dicyclohexylcarbodiimide (DCC, 99%), and 4-(dimethylamino)pyridine (DMAP, 99%) were all purchased from Aldrich and used as received. Zinc meso-tetra(*N*-methyl-4-pyridyl) porphine tetrachloride ( $\text{ZnTMPyP}$ ) was purchased from Frontier Scientific.

### Instrumentation

Gel Permeation Chromatography (GPC) was used to characterize synthesized polymer (MWDs,  $M_n$ , and  $\bar{D}$ ) with dimethylacetamide (DMAc) as the eluent. The GPC instrument was comprised of a Shimadzu modular system with an autoinjector, a Phenomenex 5.0  $\mu\text{M}$  bead size guard column ( $50 \times 7.5 \text{ mm}$ ) followed by four Phenomenex 5.0  $\mu\text{M}$  bead size columns ( $10^5$ ,  $10^4$ ,  $10^3$ , and  $10^2 \text{ \AA}$ ), and a differential refractive-index detector. The GPC system was calibrated based on the narrow molecular weight distribution of PMMA standards with molecular weights of 200 to  $10^6 \text{ g mol}^{-1}$ .

Nuclear Magnetic Resonance (NMR) spectroscopy was carried out with Bruker Avance III HD 400 MHz NMR for  $^1\text{H}$  using  $\text{CDCl}_3$  and  $\text{DMSO-d}_6$  as solvent. Tetramethylsilane (TMS) was used as a reference. The data was reported as chemical shift ( $\delta$ ) measured in ppm downfield from TMS.

Online Fourier Transform Near-Infrared (FTNIR) was used for monitoring monomer conversion by

calculating the decrement of the vinylic C-H stretching overtone of the monomer at  $\sim 6200\text{ cm}^{-1}$ . A Bruker IFS 66/S Fourier transform spectrometer equipped with a tungsten halogen lamp, a CaF<sub>2</sub> beam splitter, and liquid nitrogen cooled InSb detector was used. The prepared sample was placed in an FTNIR glass cuvette (1 cm  $\times$  2 mm) and polymerized under NIR ( $\lambda_{\text{max}} = 730\text{ nm}$ ) LED light irradiation. The sample was manually placed into the cuvette holder, with each spectrum comprising 16 scans with a resolution of  $4\text{ cm}^{-1}$  in the region of  $8000\text{--}4000\text{ cm}^{-1}$ . The measurement time per spectrum was around 10 seconds, and the results from FTNIR were analyzed with OPUS software.

UV-vis Spectroscopy was measured using a CARY 300 spectrophotometer (Varian) using a quartz cuvette (1 cm  $\times$  1 cm).

Dynamic Light Scattering (DLS) measurements were performed using a Malvern Zetasizer Ultra and analyzed by ZS Xplorer software. A 4 mW He-Ne laser operating at a wavelength of 633 nm and an avalanche photodiode (APD) detector were used. The scattered light was detected at an angle of  $173^\circ$ .

Transmission Electron Microscopy (TEM) studies of self-assembled block copolymers were conducted at an accelerating voltage of 100 kV (JEOL-1400). The polymerization dispersions were diluted with water to give 0.2 - 0.5 wt% dispersions and deposited onto carbon-coated copper grids. Uranyl acetate staining was applied to all samples.

Photopolymerizations were performed in quartz cuvettes (1 cm  $\times$  2 mm) or 2 ml glass vials where the prepared mixtures were irradiated by NIR ( $\lambda_{\text{max}} = 730\text{ nm}$ ), violet ( $\lambda_{\text{max}} = 405\text{ nm}$ ), and green ( $\lambda_{\text{max}} = 530\text{ nm}$ ) LEDs. The light intensity was quantified by Newport 843-R Power Meter.

### **Synthesis of PEG<sub>113</sub>-CDTPA macroRAFT agent**

CDTPA (0.97 g, 2.4 mmol) in DCM (20 mL) was added to a flask containing PEG<sub>113</sub> (6 g, 1.2 mmol) and a stirrer bar. Then a solution of DCC (0.5 g, 2.4 mmol) and DMAP (0.029 g, 0.24 mmol) in DCM (10 mL) was added dropwise to the reaction mixture at  $0^\circ\text{C}$ . The flask was sealed with a rubber septum and purged with nitrogen for 30 min at  $0^\circ\text{C}$ . The esterification reaction was allowed to proceed with stirring at room temperature for 48 hours. PEG<sub>113</sub>-CDTPA macroRAFT agent was collected by filter and repeated precipitation of the reaction mixture in cold diethyl ether.

### **Experiments of quenching singlet oxygen ( $^1\text{O}_2$ ) and superoxide ( $\text{O}_2^{\cdot-}$ )**

Experiments of quenching singlet oxygen ( $^1\text{O}_2$ ) by 9,10-dimethylanthracene

As an example, experiments of quenching  $^1\text{O}_2$  with a stoichiometry of  $[\text{ZnPcS}_4^-]:[9,10\text{-DMA}]:[\text{TEOA}] = 0.002:0.02:1$  was conducted as follows: A reaction solution consisting of DMF (190  $\mu\text{L}$ ), water (170  $\mu\text{L}$ ),  $\text{ZnPcS}_4^-$  (17  $\mu\text{L}$  of 1.113 mM  $\text{ZnPcS}_4^-$  in water stock solution, 0.0194  $\mu\text{mol}$ ), 9,10-dimethylantracene (9,10-DMA) (10  $\mu\text{L}$  of 19.4 mM 9,10-DMA in DMF stock solution, 0.194  $\mu\text{mol}$ ), and TEOA (13  $\mu\text{L}$  of 750 mM TEOA in water stock solution, 9.70  $\mu\text{mol}$ ) was prepared in a quartz cuvette (1 cm  $\times$  2 mm) and sealed with a rubber septum. Under the irradiation of NIR light ( $\lambda_{\text{max}} = 730$  nm;  $I = 12$  mW  $\text{cm}^{-2}$ ), the characteristic peak of 9,10-DMA (absorption at  $\sim 379$  nm) was monitored by UV-vis spectroscopy at designated time points. Decreasing absorption of 9,10-DMA reflected the successful  $^1\text{O}_2$  trapping (**Scheme S1A**). In the presence of higher concentrations of TEOA, slower decreasing rates of 9,10-DMA absorption were observed, indicating  $^1\text{O}_2$  was also quenched by TEOA.

#### Experiments of quenching superoxide ( $\text{O}_2^{\bullet-}$ ) by nitrotetrazolium blue chloride

As an example, experiments of quenching  $\text{O}_2^{\bullet-}$  by nitrotetrazolium blue chloride (NBT) with a stoichiometry of  $[\text{ZnPcS}_4^-]:[\text{TEOA}]:[\text{NBT}] = 0.002:4:0.05$  was conducted as follows: A reaction solution consisting of water (131  $\mu\text{L}$ ),  $\text{ZnPcS}_4^-$  (17  $\mu\text{L}$  of 1.113 mM  $\text{ZnPcS}_4^-$  in water stock solution, 0.0194  $\mu\text{mol}$ ), TEOA (52  $\mu\text{L}$  of 750 mM TEOA in water stock solution, 38.8  $\mu\text{mol}$ ), and NBT (200  $\mu\text{L}$  of 2.43 mM NBT in DMF stock solution, 0.485  $\mu\text{mol}$ ) was prepared in a quartz cuvette (1 cm  $\times$  2 mm) and sealed with a rubber septum. Under the irradiation of NIR light ( $\lambda_{\text{max}} = 730$  nm;  $I = 12$  mW  $\text{cm}^{-2}$ ), generated  $\text{O}_2^{\bullet-}$  was quenched by NBT, forming monoformazan (MF; absorption at  $\sim 525$  nm) and diformazan (DF; absorption at  $\sim 740$  nm) (**Scheme S1B**). MF and DF. Therefore, increasing absorption of MF and DF reflected the  $\text{O}_2^{\bullet-}$  trapping. In the presence of TEOA, increasing absorption at  $\sim 525$  nm and  $\sim 740$  were observed, indicating  $\text{O}_2^{\bullet-}$  was generated by TEOA.

### **Homogenous photo-RAFT polymerization**

#### General procedure for aqueous photo-RAFT polymerizations mediated by $\text{ZnPcS}_4^-$ in the absence of oxygen under NIR LED light (PET-RAFT via an oxidative quenching pathway (OQP))

As an example, PET-RAFT polymerization with a reaction stoichiometry of  $[\text{DMA}]:[\text{CTCPA}]:[\text{ZnPcS}_4^-] = 200:1:0.01$  was conducted as follows: A reaction solution consisting of water (113  $\mu\text{L}$ ), *N*, *N*-dimethylacrylamide (DMA, 200  $\mu\text{L}$ , 1.941 mmol, 50 vol%), CTCPA (2.98 mg, 9.70  $\mu\text{mol}$ ), and  $\text{ZnPcS}_4^-$  (87  $\mu\text{L}$  of 1.113 mM  $\text{ZnPcS}_4^-$  in water stock solution, 0.0970  $\mu\text{mol}$ ; 50 ppm relative to monomer) was prepared in a quartz cuvette (1 cm  $\times$  2 mm) and sealed with a rubber septum. After deoxygenation for 15 mins, the cuvette was placed under a NIR ( $\lambda_{\text{max}} = 730$  nm;  $I = 60$  mW  $\text{cm}^{-2}$ ) LED light at room temperature. The monomer conversion was monitored by online FTNIR by calculating the decrement of the vinylic C-H stretching overtone of the monomer (6100-6220  $\text{cm}^{-1}$ ) at designated time points. After reaching a certain

monomer conversion, the cuvette was removed from the light source, and aliquots were removed for GPC (DMAc) and  $^1\text{H}$  NMR analyses.

General procedure for aqueous photo-RAFT polymerizations mediated by  $\text{ZnPcS}_4^-$  in the absence of oxygen under NIR LED light (PET-RAFT via a reductive quenching pathway (RQP))

As an example, PET-RAFT polymerization with a reaction stoichiometry of  $[\text{DMA}]:[\text{CTCPA}]:[\text{ZnPcS}_4^-] = 200:1:4:0.01$  was conducted as follows: A reaction solution consisting of water (108  $\mu\text{L}$ ), *N, N*-dimethylacrylamide (DMA, 200  $\mu\text{L}$ , 1.941 mmol, 50 vol%), CTCPA (2.98 mg, 9.70  $\mu\text{mol}$ ),  $\text{ZnPcS}_4^-$  (87  $\mu\text{L}$  of 1.113 mM  $\text{ZnPcS}_4^-$  in water stock solution, 0.0970  $\mu\text{mol}$ ; 50 ppm relative to monomer), and TEOA (5.2  $\mu\text{L}$ , 38.80  $\mu\text{mol}$ ) was prepared in a quartz cuvette (1 cm  $\times$  2 mm) and sealed with a rubber septum. After deoxygenation for 15 mins, the cuvette was placed under a NIR ( $\lambda_{\text{max}} = 730$  nm;  $I = 60$  mW  $\text{cm}^{-2}$ ) LED light at room temperature. The monomer conversion was monitored by online FTNIR by calculating the decrement of the vinylic C-H stretching overtone of the monomer (6100-6220  $\text{cm}^{-1}$ ) at designated time points. After reaching relatively high monomer conversion, the cuvette was removed from the light source, and aliquots were removed for GPC (DMAc) and  $^1\text{H}$  NMR analyses.

General procedure for aqueous photo-RAFT polymerizations mediated by  $\text{ZnPcS}_4^-$  in the presence of TEOA and oxygen under NIR LED light (via an oxygen-mediated photoinitiation (O-PI))

As an example, photo-RAFT polymerization with a reaction stoichiometry of  $[\text{DMA}]:[\text{CTCPA}]:[\text{TEOA}]:[\text{ZnPcS}_4^-] = 200:1:4:0.01$  was conducted as follows: A reaction solution consisting of water (108  $\mu\text{L}$ ), *N, N*-dimethylacrylamide (DMA, 200  $\mu\text{L}$ , 1.941 mmol, 50 vol%), CTCPA (2.98 mg, 9.70  $\mu\text{mol}$ ),  $\text{ZnPcS}_4^-$  (87  $\mu\text{L}$  of 1.113 mM  $\text{ZnPcS}_4^-$  in water stock solution, 0.0970  $\mu\text{mol}$ ; 50 ppm relative to monomer), and TEOA (5.2  $\mu\text{L}$ , 38.80  $\mu\text{mol}$ ) was prepared in a quartz cuvette (1 cm  $\times$  2 mm) and sealed with a rubber septum. After that, the cuvette was placed without deoxygenation under a NIR ( $\lambda_{\text{max}} = 730$  nm;  $I = 60$  mW  $\text{cm}^{-2}$ ) LED light at room temperature. The monomer conversion was monitored by online FTNIR by calculating the decrement of the vinylic C-H stretching overtone of the monomer (6100-6220  $\text{cm}^{-1}$ ) at designated time points. After reaching relatively high monomer conversion, the cuvette was removed from the light source, and aliquots were removed for GPC (DMAc) and  $^1\text{H}$  NMR analyses.

Procedure for aqueous photo-RAFT polymerizations mediated by  $\text{ZnPcS}_4^-$  in the presence of  $\text{H}_2\text{O}_2$  without deoxygenation under NIR LED light

As an example, photo-RAFT polymerization with a reaction stoichiometry of  $[\text{DMA}]:[\text{CTCPA}]:[\text{H}_2\text{O}_2]:[\text{ZnPcS}_4^-] = 200:1:1:0.01$  was conducted as follows: A reaction solution consisting of water (103  $\mu\text{L}$ ), *N, N*-dimethylacrylamide (DMA, 200  $\mu\text{L}$ , 1.941 mmol, 50 vol%), CTCPA (2.98 mg, 9.70  $\mu\text{mol}$ ),  $\text{ZnPcS}_4^-$  (87  $\mu\text{L}$  of 1.113 mM  $\text{ZnPcS}_4^-$  in water stock solution, 0.0970  $\mu\text{mol}$ ; 50 ppm relative to monomer),  $\text{H}_2\text{O}_2$  (10  $\mu\text{L}$  of 970 mM  $\text{H}_2\text{O}_2$  in water stock solution, 9.70  $\mu\text{mol}$ ), and DMF (1.89 mg, 2  $\mu\text{L}$ , 0.066 mmol, added as a  $^1\text{H}$  NMR internal standard) was prepared in a quartz cuvette (1 cm  $\times$  2

mm) and sealed with a rubber septum. After that, the cuvette was placed without deoxygenation under a NIR ( $\lambda_{\text{max}} = 730 \text{ nm}$ ;  $I = 60 \text{ mW cm}^{-2}$ ) LED light at room temperature. The monomer conversion was monitored by online FTNIR by calculating the decrement of the vinylic C-H stretching overtone of the monomer ( $6100\text{-}6220 \text{ cm}^{-1}$ ) at designated time points. After reaching relatively high monomer conversion, the cuvette was removed from the light source, and aliquots were removed for GPC (DMAc) and  $^1\text{H}$  NMR analyses.

General procedure for chain extension mediated by  $\text{ZnPcS}_4^-$  in presence of TEOA and oxygen under NIR LED light ( $\lambda_{\text{max}} = 730 \text{ nm}$ ) in an aqueous solution

In general, the homopolymer was synthesized similarly to the general procedure outlined above. The  $\text{DP}_{\text{target}}$  was reduced to 100 using the first block with a reaction stoichiometry of  $[\text{DMA}]:[\text{CTCPA}]:[\text{TEOA}]:[\text{ZnPcS}_4^-] = 100:1:2:0.005$ . As an example, a PDMA macroRAFT agent was first synthesized in a cuvette containing water (108  $\mu\text{L}$ ), *N, N*-dimethylacrylamide (DMA, 200  $\mu\text{L}$ , 1.941 mmol, 50 vol%), CTCPA (5.96 mg, 19.40  $\mu\text{mol}$ ),  $\text{ZnPcS}_4^-$  (87  $\mu\text{L}$  of 1.113 mM  $\text{ZnPcS}_4^-$  in water stock solution, 0.0970  $\mu\text{mol}$ ; 50 ppm relative to monomer), and TEOA (5.2  $\mu\text{L}$ , 38.80  $\mu\text{mol}$ ). After that, the cuvette was placed without deoxygenation under a NIR ( $\lambda_{\text{max}} = 730 \text{ nm}$ ;  $I = 60 \text{ mW cm}^{-2}$ ) LED light at room temperature for 6 hours. The monomer conversion was monitored by online FTNIR by calculating the decrement of the vinylic C-H stretching overtone of the monomer ( $6100\text{-}6220 \text{ cm}^{-1}$ ). The polymerization was stopped and removed for  $^1\text{H}$  NMR (93 % monomer conversion) and GPC ( $M_n = 9900$ ,  $D = 1.12$ ) analyses.

A degree of polymerization (DP) of 400 monomer units was targeted to observe a clear shift in molecular weight distributions (MWDs). For example, for the chain extension of the above PDMA macroRAFT agent with DMA, a reaction stoichiometry of  $[\text{DMA}]:[\text{CTCPA}]:[\text{TEOA}]:[\text{ZnPcS}_4^-] = 400:1:8:0.02$  was used. The reaction solution consisted of water (8  $\mu\text{L}$ ), *N, N*-dimethylacrylamide (DMA, 200  $\mu\text{L}$ , 1.941 mmol, 50 vol%), above crude PDMA macroRAFT agent water solution (100  $\mu\text{L}$ , 4.85  $\mu\text{mol}$ ),  $\text{ZnPcS}_4^-$  (87  $\mu\text{L}$  of 1.113 mM  $\text{ZnPcS}_4^-$  in water stock solution, 0.0970  $\mu\text{mol}$ ; 50 ppm relative to monomer), and TEOA (5.2  $\mu\text{L}$ , 38.80  $\mu\text{mol}$ ). After that, the cuvette was placed without deoxygenation under a NIR ( $\lambda_{\text{max}} = 730 \text{ nm}$ ;  $I = 60 \text{ mW cm}^{-2}$ ) LED light at room temperature for 4 hours. The polymerization was stopped and removed for  $^1\text{H}$  NMR (83 % monomer conversion) and GPC ( $M_n = 38900$ ,  $D = 1.11$ ) analyses.

General procedure for aqueous photo-RAFT polymerizations mediated by  $\text{ZnPcS}_4^-$  in the presence of TEOA and oxygen under NIR LED light ( $\lambda_{\text{max}} = 730 \text{ nm}$ ) passing through different barriers

As an example, photo-RAFT polymerization with a reaction stoichiometry of  $[\text{DMA}]:[\text{CTCPA}]:[\text{TEOA}]:[\text{ZnPcS}_4^-] = 200:1:4:0.01$  was conducted as follows: A reaction solution consisting of water (108  $\mu\text{L}$ ), *N, N*-dimethylacrylamide (DMA, 200  $\mu\text{L}$ , 1.941 mmol, 50 vol%), CTCPA (2.98 mg, 9.70  $\mu\text{mol}$ ),  $\text{ZnPcS}_4^-$  (87  $\mu\text{L}$  of 1.113 mM  $\text{ZnPcS}_4^-$  in water stock solution, 0.0970  $\mu\text{mol}$ ; 50 ppm relative to monomer), and TEOA (5.2  $\mu\text{L}$ , 38.80  $\mu\text{mol}$ ) was prepared in a quartz cuvette (1 cm  $\times$  2 mm) and sealed with a rubber septum. Photopolymerization through barriers was performed by warping the cuvette

with appropriate barriers (**Figure S14**) with the thickness measured by a set of calipers. The barriers used in this test include print paper ( $\sim 0.10$  mm), and pig skin (from pig leg with the extra fat removed). Thereafter, the reaction was placed under a NIR ( $\lambda_{\text{max}} = 730$  nm;  $I = 60$  mW cm $^{-2}$ ) LED light without deoxygenation at room temperature. The monomer conversion was monitored by online FTNIR by calculating the decrement of the vinylic C-H stretching overtone of the monomer (6100-6220 cm $^{-1}$ ) at designated time points. After reaching relatively high monomer conversion, the cuvette was removed from the light source, and aliquots were removed for GPC (DMAc) and  $^1\text{H}$  NMR analyses.

General procedure for aqueous photo-RAFT polymerizations mediated by ZnTMPyP in the presence of oxygen under violet ( $\lambda_{\text{max}} = 405$  nm) or green ( $\lambda_{\text{max}} = 530$  nm) LED light

As an example, photo-RAFT polymerization with a reaction stoichiometry of [DMA]:[CTCPA]:[ZnPcS $_4^-$ ] = 200:1:0.01 was conducted as follows: A reaction solution consisting of water (109  $\mu\text{L}$ ), *N,N*-dimethylacrylamide (DMA, 200  $\mu\text{L}$ , 1.941 mmol, 50 vol%), CTCPA (2.98 mg, 9.70  $\mu\text{mol}$ ), and ZnTMPyP (86  $\mu\text{L}$  of 1.131 mM ZnTMPyP in water stock solution, 0.0970  $\mu\text{mol}$ ; 50 ppm relative to monomer) was prepared in a quartz cuvette (1 cm  $\times$  2 mm) and sealed with a rubber septum. Subsequently, the cuvette was placed without deoxygenation under a violet ( $\lambda_{\text{max}} = 405$  nm;  $I_0 = 45$  mW cm $^{-2}$ ) or a green ( $\lambda_{\text{max}} = 530$  nm;  $I_0 = 72$  mW cm $^{-2}$ ) LED light at room temperature. The monomer conversion was monitored by online FTNIR by calculating the decrement of the vinylic C-H stretching overtone of the monomer (6100–6220 cm $^{-1}$ ) at designated time points. After reaching relatively high monomer conversion, the cuvette was removed from the light source, and aliquots were removed for GPC (DMAc) and  $^1\text{H}$  NMR analyses.

General procedure for aqueous photo-RAFT polymerizations mediated by ZnTMPyP in the presence of oxygen under violet ( $\lambda_{\text{max}} = 405$  nm) or green ( $\lambda_{\text{max}} = 530$  nm) LED light passing through 3.0 mm pig skin

As an example, photo-RAFT polymerization with a reaction stoichiometry of [DMA]:[CTCPA]:[ZnPcS $_4^-$ ] = 200:1:0.01 was conducted as follows: A reaction solution consisting of water (109  $\mu\text{L}$ ), *N,N*-dimethylacrylamide (DMA, 200  $\mu\text{L}$ , 1.941 mmol, 50 vol%), CTCPA (2.98 mg, 9.70  $\mu\text{mol}$ ), and ZnTMPyP (86  $\mu\text{L}$  of 1.131 mM ZnTMPyP in water stock solution, 0.0970  $\mu\text{mol}$ ; 50 ppm relative to monomer) was prepared in a quartz cuvette (1 cm  $\times$  2 mm) and sealed with a rubber septum. Photopolymerization through barriers was performed by warping the cuvette with 3.0 mm pig skin. Thereafter, the reaction was placed under a violet ( $\lambda_{\text{max}} = 405$  nm;  $I_0 = 45$  mW cm $^{-2}$ ) or a green ( $\lambda_{\text{max}} = 530$  nm;  $I_0 = 72$  mW cm $^{-2}$ ) LED light without deoxygenation at room temperature. The monomer conversion was monitored by online FTNIR by calculating the decrement of the vinylic C-H stretching overtone of the monomer (6100-6220 cm $^{-1}$ ) at designated time points. After reaching relatively high monomer conversion, the cuvette was removed from the light source, and aliquots were removed for GPC (DMAc) and  $^1\text{H}$  NMR analyses.

## Photo-RAFT dispersion polymerization

### Kinetic studies of photo-RAFT dispersion polymerization of HPMA mediated by $\text{ZnPcS}_4^-$ in the presence of TEOA and oxygen under NIR LED light ( $\lambda_{\text{max}} = 730 \text{ nm}$ )

For example, kinetics of the photo-RAFT dispersion polymerization of HPMA with a reaction stoichiometry of  $[\text{HPMA}]:[\text{PEG}_{113}\text{-CDTPA}]:[\text{TEOA}]:[\text{ZnPcS}_4^-] = 350:1:4:0.02$  at a total solids content of 20 wt% was conducted as follows: A reaction solution consisting of  $\text{PEG}_{113}\text{-CDTPA}$  (21.61 mg, 4.01  $\mu\text{mol}$ ), HPMA (190  $\mu\text{L}$ , 202.54 mg, 1.40 mmol),  $\text{ZnPcS}_4^-$  (72.10  $\mu\text{g}$ , 0.080  $\mu\text{mol}$ , 72.1  $\mu\text{L}$  of a 1 mg  $\text{mL}^{-1}$  aqueous stock solution), DMF (9.44 mg, 10  $\mu\text{L}$ , 0.13 mmol, added as the  $^1\text{H}$  NMR internal standard), TEOA (2.1  $\mu\text{L}$ , 16.05  $\mu\text{mol}$ ) and water (725.8  $\mu\text{L}$ ) were prepared in a 2 mL glass vial. A stirrer bar was added to the vial, and the vial was sealed with a cap. After that, the reaction was placed under a NIR ( $\lambda_{\text{max}} = 730 \text{ nm}$ ;  $I = 60 \text{ mW cm}^{-2}$ ) LED light without deoxygenation on a mixing plate at room temperature. Aliquots were taken for analysis by  $^1\text{H}$  NMR, GPC, and TEM at determined time points. Monomer conversions were calculated using  $^1\text{H}$  NMR ( $d_6\text{-DMSO}$ ) relative to DMF as an internal standard. Molecular weight values ( $M_n, \text{GPC}$ ) and polymer dispersity ( $\mathcal{D}$ ) were characterized by GPC (DMAc, PMMA standards). Morphologies of synthesized polymeric nanoparticles were characterized by TEM.

### Photo-RAFT dispersion polymerization of HPMA mediated by $\text{ZnPcS}_4^-$ in the presence of TEOA and oxygen under NIR LED light ( $\lambda_{\text{max}} = 730 \text{ nm}$ )

For example, photo-RAFT dispersion polymerization of HPMA with a reaction stoichiometry of  $[\text{HPMA}]:[\text{PEG}_{113}\text{-CDTPA}]:[\text{TEOA}]:[\text{ZnPcS}_4^-] = 300:1:4:0.02$  at a total solids content of 10 wt% was conducted as follows: A reaction solution consisting of  $\text{PEG}_{113}\text{-CDTPA}$  (12.48 mg, 2.32  $\mu\text{mol}$ ), HPMA (94  $\mu\text{L}$ , 100.20 mg, 0.70 mmol),  $\text{ZnPcS}_4^-$  (41.6  $\mu\text{g}$ , 0.046  $\mu\text{mol}$ , 41.6  $\mu\text{L}$  of a 1 mg  $\text{mL}^{-1}$  aqueous stock solution), DMF (9.44 mg, 10  $\mu\text{L}$ , 0.13 mmol, added as a  $^1\text{H}$  NMR internal standard), TEOA (1.2  $\mu\text{L}$ , 9.27  $\mu\text{mol}$ ) and water (853.2  $\mu\text{L}$ ) were prepared in a 2 mL glass vial. A stirrer bar was added to the vial, and the vial was sealed with a cap. After that, the reaction was placed under a NIR ( $\lambda_{\text{max}} = 730 \text{ nm}$ ;  $I = 60 \text{ mW cm}^{-2}$ ) LED light without deoxygenation on a mixing plate at room temperature. After 24 hours, the reaction was removed from the light source, and aliquots were removed for  $^1\text{H}$  NMR, GPC (DMAc), and TEM analyses.

### Photo-RAFT dispersion polymerization of HPMA mediated by $\text{ZnPcS}_4^-$ under NIR LED light ( $\lambda_{\text{max}} = 730 \text{ nm}$ ) passing through 6.0 mm pig skin

Kinetics of the photo-RAFT dispersion polymerization of HPMA with a reaction stoichiometry of  $[\text{HPMA}]:[\text{PEG}_{113}\text{-CDTPA}]:[\text{TEOA}]:[\text{ZnPcS}_4^-] = 350:1:4:0.02$  at a total solids content of 20 wt% was conducted as follows: A reaction solution consisting of  $\text{PEG}_{113}\text{-CDTPA}$  (21.61 mg, 4.01  $\mu\text{mol}$ ), HPMA (190  $\mu\text{L}$ , 202.54 mg, 1.40 mmol),  $\text{ZnPcS}_4^-$  (72.10  $\mu\text{g}$ , 0.080  $\mu\text{mol}$ , 72.1  $\mu\text{L}$  of a 1 mg  $\text{mL}^{-1}$  aqueous stock solution), DMF (9.44 mg, 10  $\mu\text{L}$ , 0.13 mmol, added as a  $^1\text{H}$  NMR internal standard), TEOA (2.1  $\mu\text{L}$ , 16.05  $\mu\text{mol}$ ) and water (725.8  $\mu\text{L}$ ) were prepared in a 2 mL glass vial. A stirrer bar was added to the vial, and the

vial was sealed with a cap. Photopolymerization through barriers was performed by warping the vial with 6.0 mm pig skin (**Figure 7A**) (the thickness was measured by a set of calipers). After that, the reaction was placed under a NIR ( $\lambda_{\text{max}} = 730 \text{ nm}$ ;  $I = 60 \text{ mW cm}^{-2}$ ) LED light without deoxygenation on a mixing plate at room temperature. At predetermined time points, aliquots were taken for analysis by  $^1\text{H}$  NMR, GPC, and TEM. Monomer conversions were calculated using  $^1\text{H}$  NMR ( $\text{d}_6\text{-DMSO}$ ) relative to DMF as an internal standard. Molecular weight values ( $M_{\text{n, GPC}}$ ) and polymer dispersity ( $\mathcal{D}$ ) were characterized by GPC (DMAc, PMMA standards). Morphologies of synthesized polymeric nanoparticles were characterized by TEM.

## ADDITIONAL RESULTS

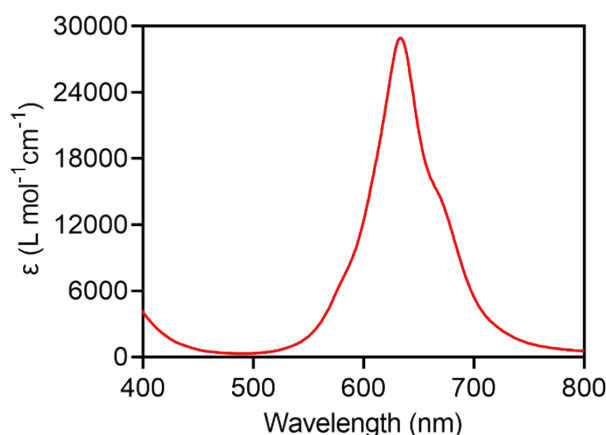

**Figure S1.** UV-vis spectrum of zinc tetrasulfonated phthalocyanine ( $\text{ZnPcS}_4^-$ ) in water.

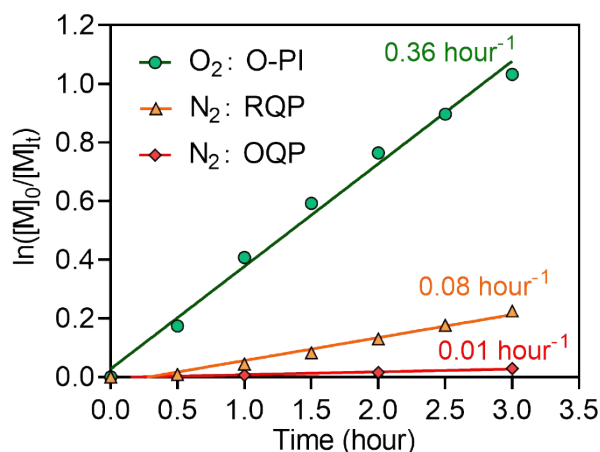

**Figure S2.** Comparison of the kinetics of photo-RAFT polymerization via three pathways, including PET-RAFT via an oxidative quenching pathway (OQP), PET-RAFT via a reductive quenching pathway (RQP) and an oxygen-mediated photoinitiation (O-PI).

### Experimental conditions:

PET-RAFT polymerization via OQP was performed at room temperature under the irradiation of NIR light c after deoxygenation in water at  $[\text{DMA}]/[\text{water}] = 50/50$  (v/v). A fixed reaction stoichiometry of  $[\text{DMA}]:[\text{CTCPA}]:[\text{ZnPcS}_4^-] = 200:1:0.01$  was used.

PET-RAFT polymerization via RQP was performed at room temperature under the irradiation of NIR light ( $\lambda_{\text{max}} = 730 \text{ nm}$ ;  $I = 60 \text{ mW cm}^{-2}$ ) after deoxygenation in water at  $[\text{DMA}]/[\text{water}] = 50/50$  (v/v). A fixed reaction stoichiometry of  $[\text{DMA}]:[\text{CTCPA}]:[\text{TEOA}]:[\text{ZnPcS}_4^-] = 200:1:4:0.01$  was used.

Photo-RAFT polymerization via O-PI was performed at room temperature under the irradiation of NIR light ( $\lambda_{\text{max}} = 730 \text{ nm}$ ;  $I = 60 \text{ mW cm}^{-2}$ ) without deoxygenation in water at  $[\text{DMA}]/[\text{water}] = 50/50$  (v/v). A fixed reaction stoichiometry of  $[\text{DMA}]:[\text{CTCPA}]:[\text{TEOA}]:[\text{ZnPcS}_4^-] = 200:1:4:0.01$  was used.

**Table S1.** Comparison of  $\text{ZnPcS}_4^-$  mediated photo-RAFT polymerization in the presence and absence of oxygen under NIR light irradiation.

| # | Deoxygenation | Time (hour) | $\alpha$ (%) | $k_p^{\text{app}}$ ( $\text{hour}^{-1}$ ) | $M_{n, \text{theo}}$ ( $\text{g mol}^{-1}$ ) | $M_{n, \text{GPC}}$ ( $\text{g mol}^{-1}$ ) | $\bar{D}$ |
|---|---------------|-------------|--------------|-------------------------------------------|----------------------------------------------|---------------------------------------------|-----------|
| 1 | yes           | 15          | 64           | 0.07                                      | 13000                                        | 13100                                       | 1.10      |
| 2 | no            | 3           | 65           | 0.36                                      | 13200                                        | 13000                                       | 1.09      |

*Note:* Reactions were performed at room temperature under NIR light irradiation ( $\lambda_{\text{max}} = 730 \text{ nm}$ ;  $I = 60 \text{ mW cm}^{-2}$ ) in water at  $[\text{DMA}]/[\text{water}] = 50/50$  (v/v). A fixed reaction stoichiometry of  $[\text{DMA}]:[\text{CTCPA}]:[\text{TEOA}]:[\text{ZnPcS}_4^-] = 200:1:4:0.01$  (50 ppm relative to monomer) was used.

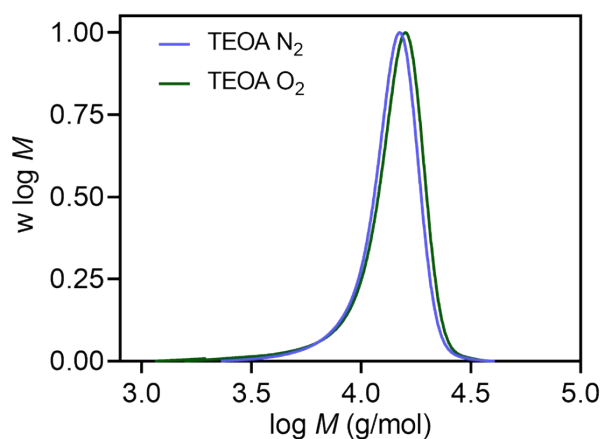

**Figure S3.** Comparison of MWDs of synthesized PDMA in the presence and absence of oxygen. Reactions were conducted under NIR light ( $\lambda_{\text{max}} = 730 \text{ nm}$ ;  $I = 60 \text{ mW cm}^{-2}$ ) without (green line) and with deoxygenation (blue line) using a fixed reaction stoichiometry of  $[\text{DMA}]:[\text{CTCPA}]:[\text{TEOA}]:[\text{ZnPcS}_4^-] = 200:1:4:0.01$ .

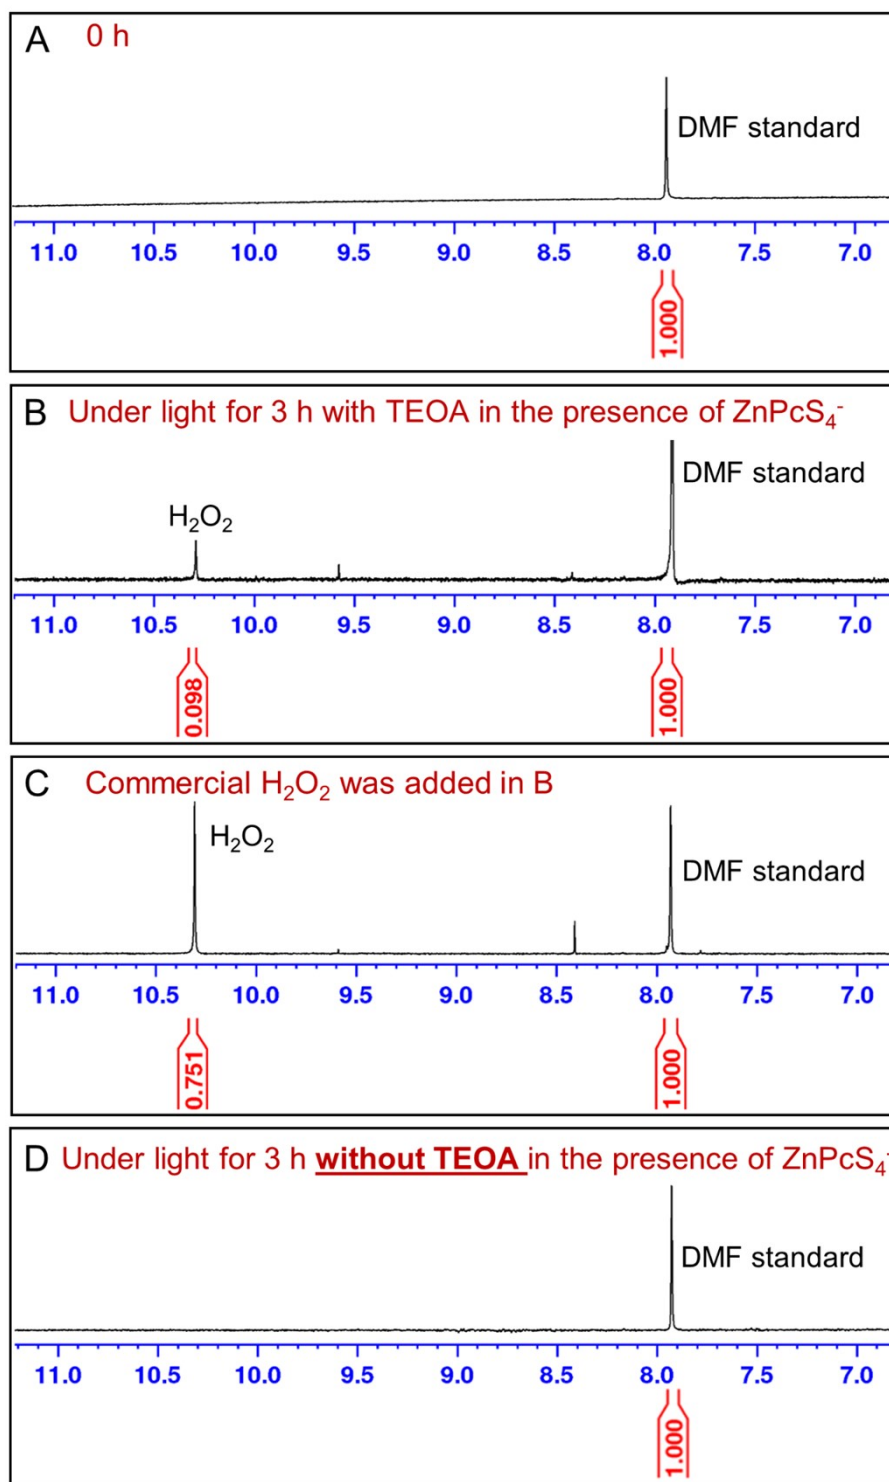

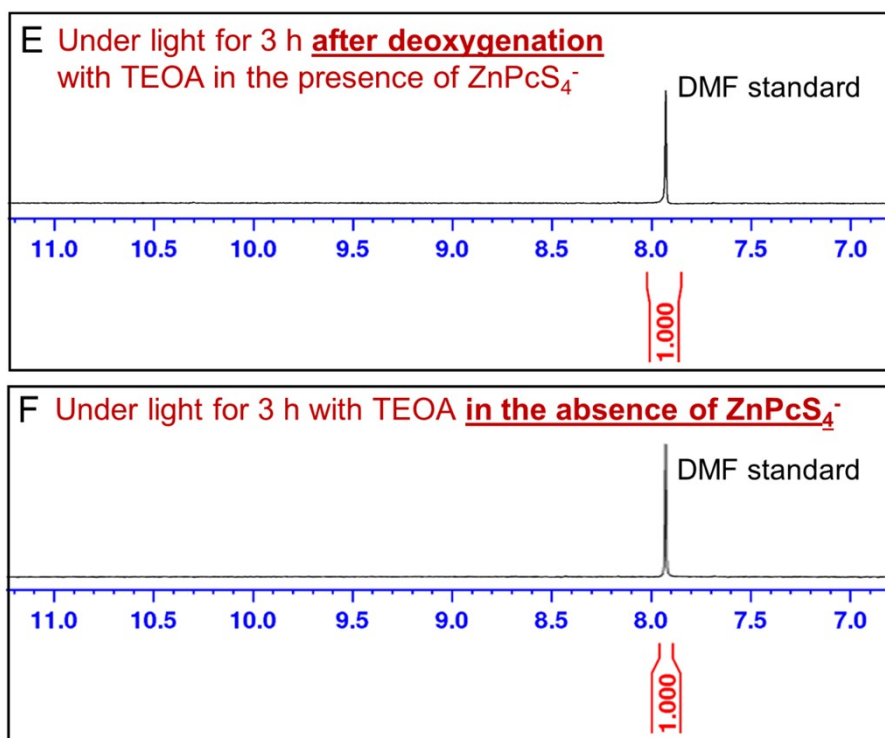

**Figure S4.** (A and B) The formation of  $\text{H}_2\text{O}_2$  as indicated by  $^1\text{H}$  NMR spectra ( $\text{d}_6$ -DMSO) with increasing irradiation time in the reaction consisting of 0.24 mM  $\text{ZnPcS}_4^-$  and 96 mM TEOA without deoxygenation. Reaction was performed at room temperature under the irradiation of NIR light ( $\lambda_{\text{max}} = 730 \text{ nm}$ ;  $I = 60 \text{ mW cm}^{-2}$ ) for 3 hours without deoxygenation. 0.24 mM  $\text{ZnPcS}_4^-$  and 97 mM TEOA were used, and 64.6 mM DMF was added as the internal standard. (C) 16 mM commercial  $\text{H}_2\text{O}_2$  was added in (B) to identify the formatting compound at  $\sim 10.3 \text{ ppm}$ . (D) A control experiment in the absence of TEOA but in the presence of  $\text{ZnPcS}_4^-$  without deoxygenation indicated the absence of  $\text{H}_2\text{O}_2$  formation under light irradiation for 3 hours. (E) A control experiment in the absence of  $\text{O}_2$  (after deoxygenation) but in the presence of  $\text{ZnPcS}_4^-$  and TEOA indicated the absence of  $\text{H}_2\text{O}_2$  formation under light irradiation for 3 hours. (F) A control experiment in the absence of  $\text{ZnPcS}_4^-$  but in the presence of TEOA and without deoxygenation indicated the absence of  $\text{H}_2\text{O}_2$  formation under light irradiation for 3 hours.

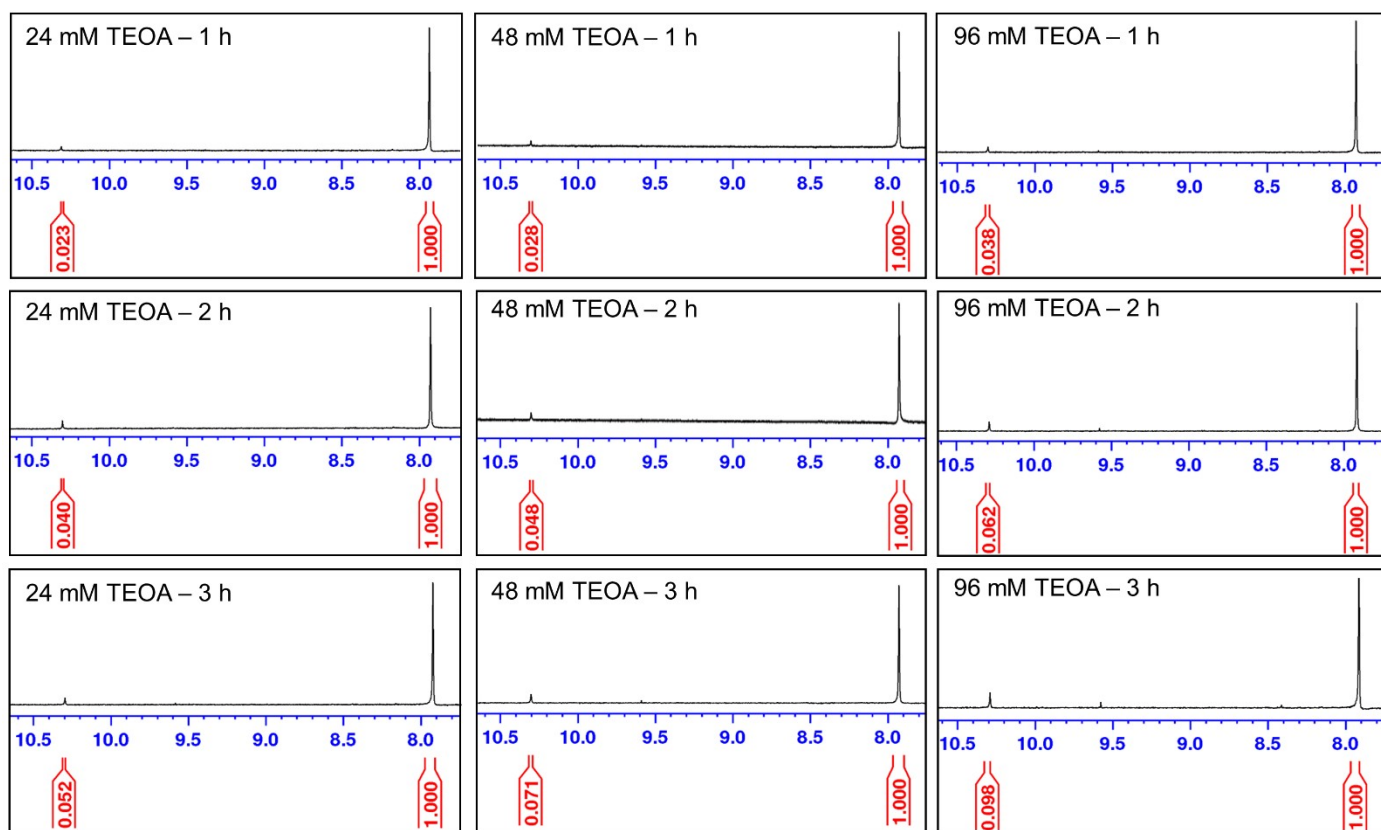

**Figure S5.** The formation of  $\text{H}_2\text{O}_2$  was detected by  $^1\text{H}$  NMR spectra ( $\text{d}_6$ -DMSO) with increasing irradiation time (1, 2, and 3 hours) in the presence of different concentrations of TEOA (24, 48, and 96 mM) without deoxygenation. Reactions consisting of 0.24 mM of  $\text{ZnPcS}_4^-$  and TEOA were performed at room temperature under the irradiation of NIR light ( $\lambda_{\text{max}} = 730 \text{ nm}$ ;  $I = 60 \text{ mW cm}^{-2}$ ) without deoxygenation in water, and 64.6 mM of DMF was used as internal standard.

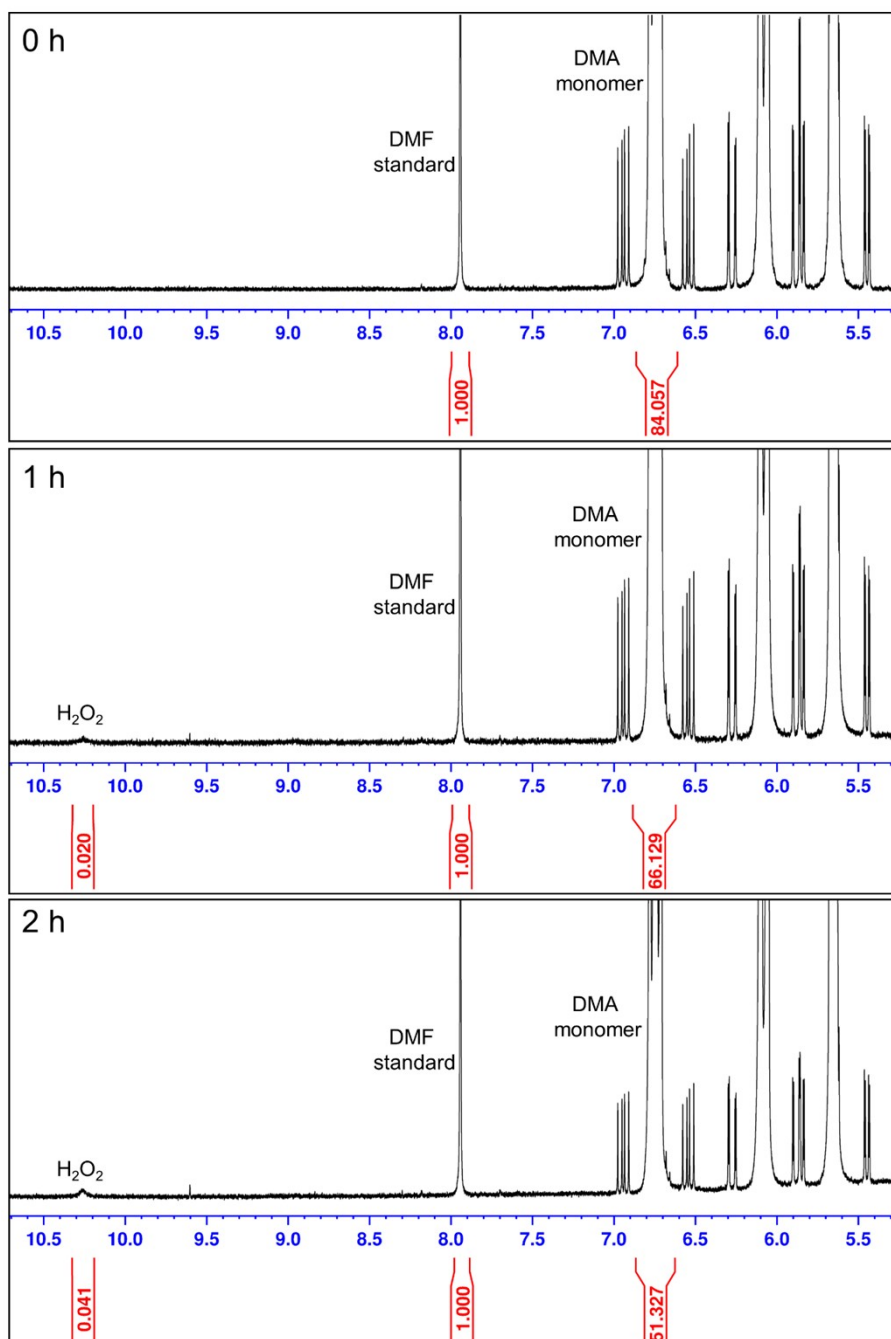

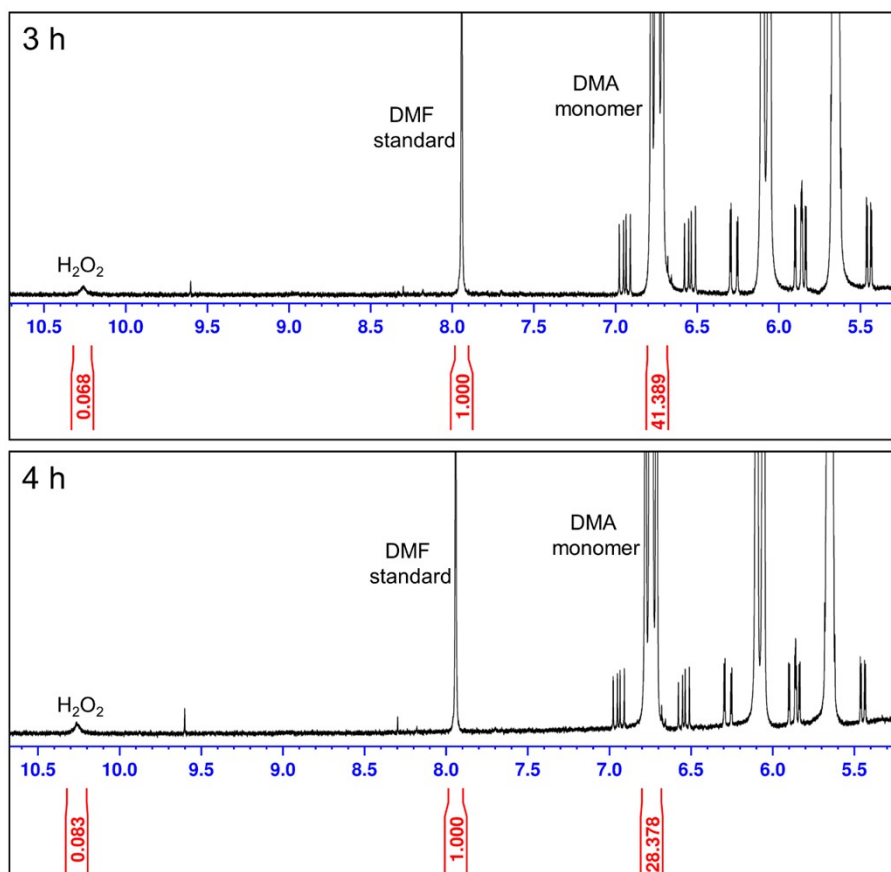

**Figure S6.** The formation of H<sub>2</sub>O<sub>2</sub> was detected by <sup>1</sup>H NMR spectra (d<sub>6</sub>-DMSO) with increasing irradiation time for ZnPcS<sub>4</sub><sup>−</sup> mediated photo-RAFT polymerization in the presence of TEOA without deoxygenation. Photo-RAFT polymerization was performed at room temperature under the irradiation of NIR light ( $\lambda_{\text{max}} = 730 \text{ nm}$ ;  $I = 60 \text{ mW cm}^{-2}$ ) without deoxygenation in water at [DMA]/[water] = 50/50 (v/v) and 64.6 mM DMF was used as internal standard. A fixed reaction stoichiometry of [DMA]:[CTCPA]:[TEOA]:[ZnPcS<sub>4</sub><sup>−</sup>] = 200:1:4:0.01 was used.

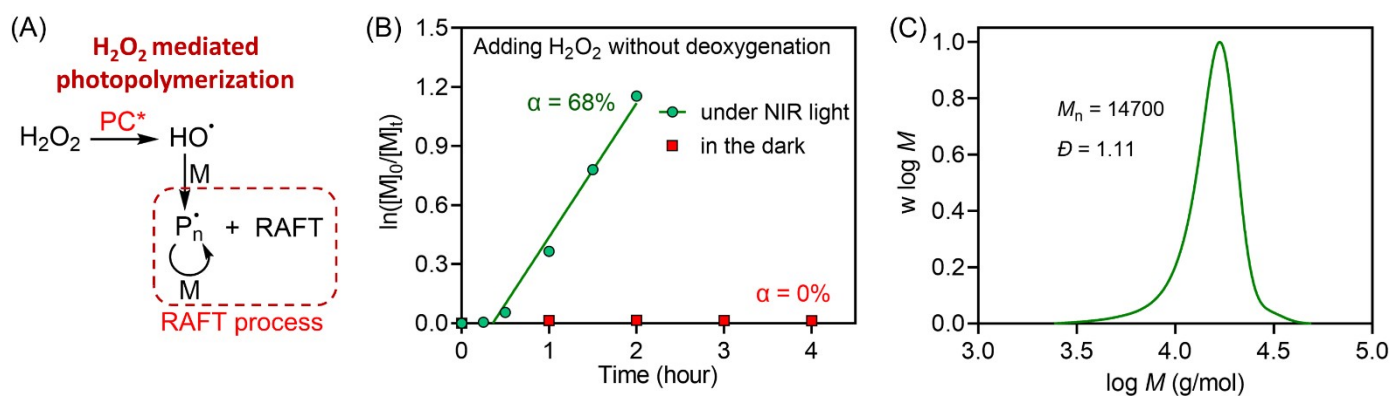

**Figure S7.** Aqueous photo-RAFT polymerization mediated by  $\text{ZnPcS}_4^-$  in the presence of 24.3 mM  $\text{H}_2\text{O}_2$  without deoxygenation under the irradiation of NIR LED light ( $\lambda_{\text{max}} = 730 \text{ nm}$ ;  $I = 60 \text{ mW cm}^{-2}$ ). Polymerization using a reaction stoichiometry of  $[\text{DMA}]:[\text{CTCPA}]:[\text{H}_2\text{O}_2]:[\text{ZnPcS}_4^-] = 200:1:1:0.01$  was conducted in water at  $[\text{DMA}]/[\text{water}] = 50/50 \text{ (v/v)}$ .

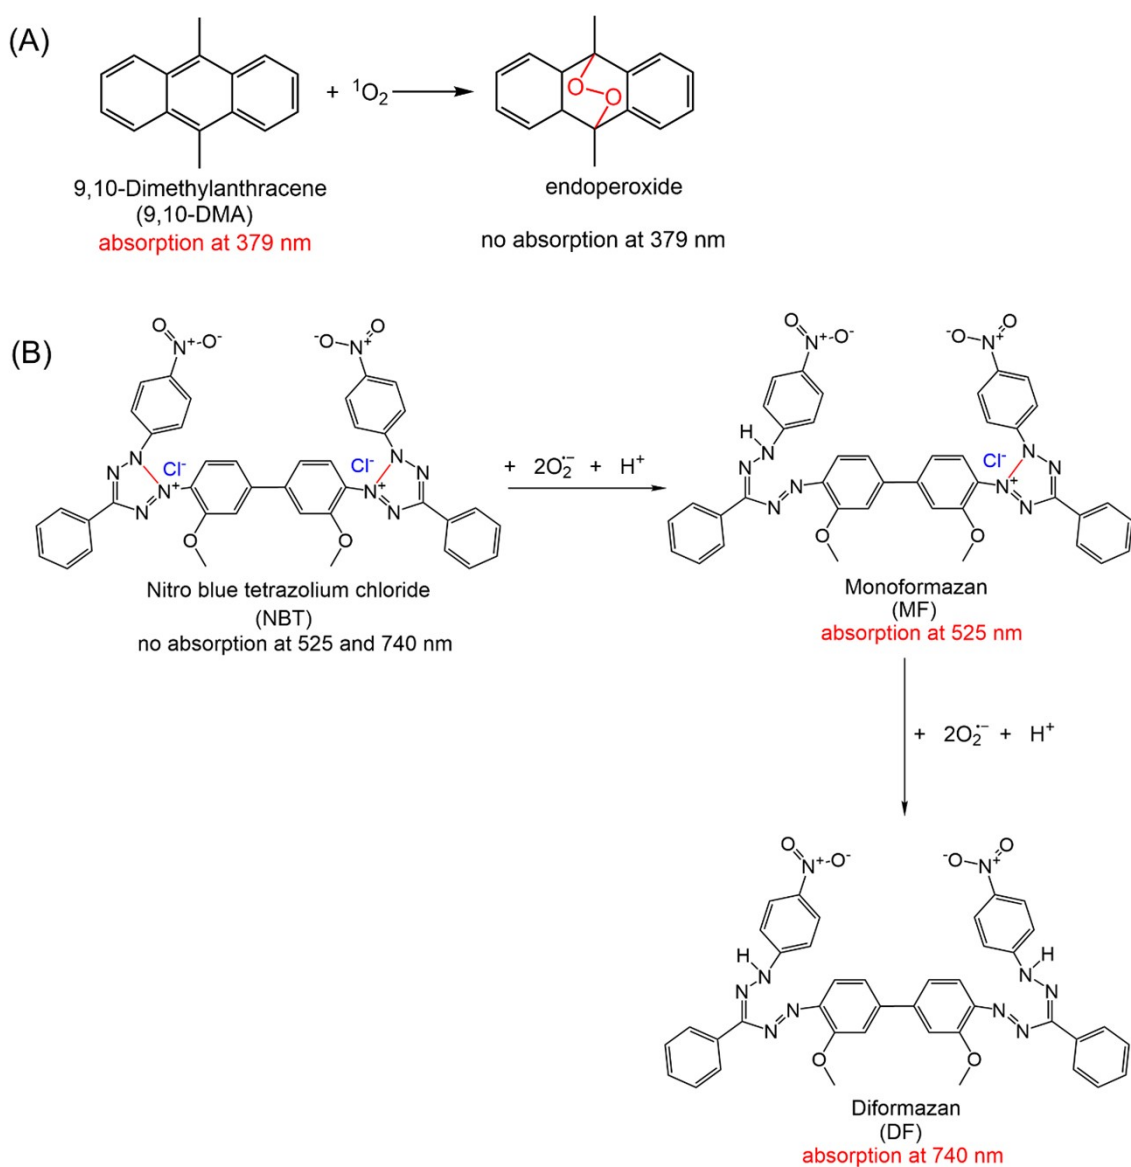

**Scheme S1.** (A) 9,10-Dimethylantracene (9,10-DMA; absorption at  $\sim 379$  nm) reacts with singlet oxygen ( $^1\text{O}_2$ ), generating the corresponding endoperoxide.<sup>1</sup> (B) Nitrotetrazolium blue chloride (NBT) reacts with superoxide ( $\text{O}_2^{\bullet -}$ ), generating monoformazan (MF; absorption at  $\sim 525$  nm) and diformazan (DF; absorption at  $\sim 740$  nm).<sup>2</sup>

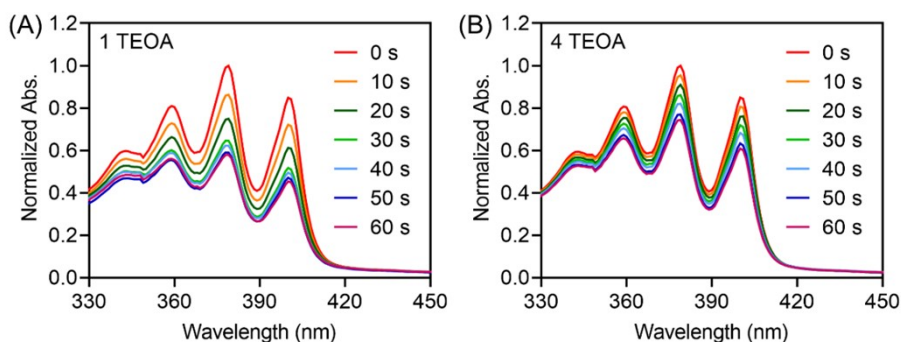

**Figure S8.** Experiments of quenching singlet oxygen ( $^1\text{O}_2$ ) by 0.485 mM 9,10-dimethylantracene (9,10-DMA) in the presence of different ratios of TEOA using a stoichiometry of  $[\text{ZnPcS}_4^-]:[9,10\text{-DMA}]:[\text{TEOA}] = 0.002:0.02:(1 \text{ and } 4)$  in water/DMF at 50/50 (v/v) under NIR light ( $\lambda_{\text{max}} = 730 \text{ nm}$ ;  $I = 12 \text{ mW cm}^{-2}$ )

Additional discussion: Decreased absorption of 9,10-DMA (at  $\sim 379 \text{ nm}$ ) reflected the successful  $^1\text{O}_2$  trapping (**Scheme S1A**).

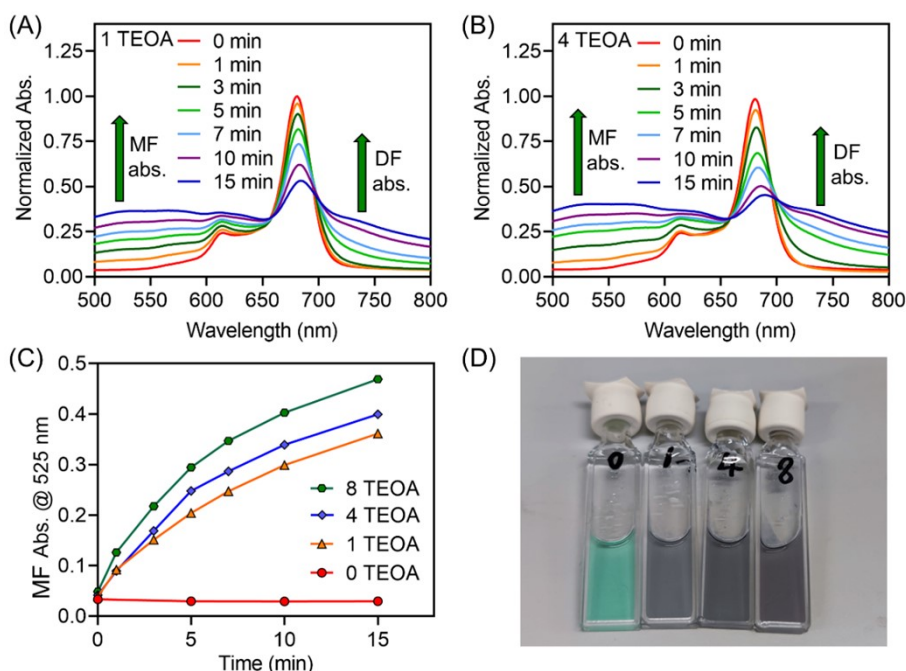

**Figure S9.** (A–B) Experiments of quenching superoxide ( $\text{O}_2^{\bullet-}$ ) by 1.215 mM nitro tetrazolium blue chloride (NBT) in the presence of different ratios of TEOA using a stoichiometry of  $[\text{ZnPcS}_4^-]:[\text{TEOA}]:[\text{NBT}] = 0.002:(1 \text{ and } 4):0.05$  in water/DMF at 50/50 (v/v) under NIR light ( $\lambda_{\text{max}} = 730 \text{ nm}$ ;  $I = 12 \text{ mW cm}^{-2}$ ); (C) Kinetics of generating MF absorption at  $\sim 525 \text{ nm}$  in the presence of different ratios of TEOA. (D) Digital photos of  $\text{O}_2^{\bullet-}$  quenching experiments with different ratios of TEOA under the irradiation of NIR light for 15 mins (the appearance of dark color indicated the formation of MF and DF).

Additional discussion: Generated  $\text{O}_2^{\bullet-}$  was quenched by NBT, to yield monoformazan (MF; absorption at  $\sim 525 \text{ nm}$ ) and diformazan (DF; absorption at  $\sim 740 \text{ nm}$ ) (**Scheme S1B**).

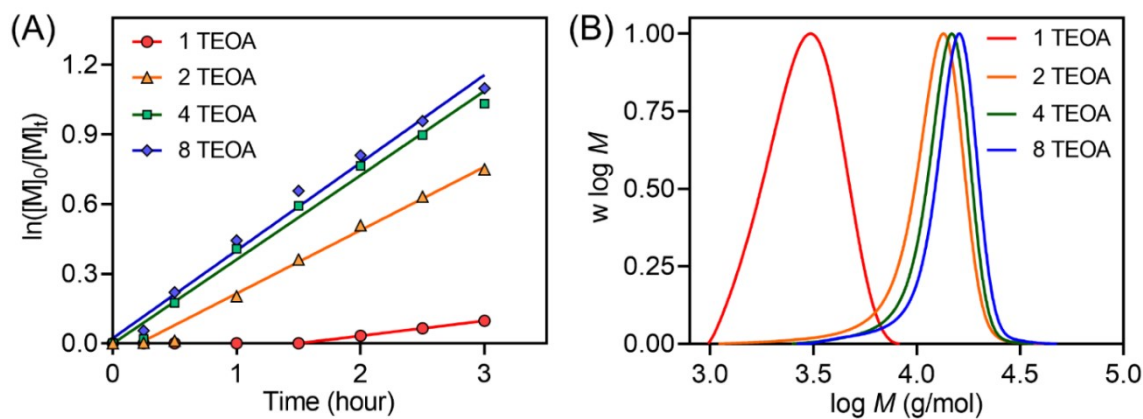

**Figure S10.** (A) Kinetics and (B) MWDs of  $\text{ZnPcS}_4^-$  mediated photo-RAFT polymerization using various ratios (1, 2, 4, and 8) of TEOA related to RAFT agent under NIR light irradiation ( $\lambda_{\text{max}} = 730 \text{ nm}$ ;  $I = 60 \text{ mW cm}^{-2}$ ) for 3 hours.

**Table S2.** Photo-RAFT polymerization mediated by  $\text{ZnPcS}_4^-$  with various ratios of TEOA.

| # | [TEOA]:[CTCPA] | $\alpha$ (%) | Induction period (min) | $k_p^{\text{app}}$ ( $\text{hour}^{-1}$ ) | $M_{n, \text{theo}}$ ( $\text{g mol}^{-1}$ ) | $M_{n, \text{GPC}}$ ( $\text{g mol}^{-1}$ ) | $\bar{D}$ |
|---|----------------|--------------|------------------------|-------------------------------------------|----------------------------------------------|---------------------------------------------|-----------|
| 1 | 1:1            | 9            | ~90                    | 0.06                                      | 2100                                         | 2700                                        | 1.15      |
| 2 | 2:1            | 53           | ~30                    | 0.27                                      | 10800                                        | 11300                                       | 1.13      |
| 3 | 4:1            | 65           | ~15                    | 0.36                                      | 13200                                        | 13000                                       | 1.09      |
| 4 | 8:1            | 67           | ~15                    | 0.38                                      | 13600                                        | 13600                                       | 1.13      |

*Note:* Reactions were performed at room temperature under NIR light irradiation ( $\lambda_{\text{max}} = 730 \text{ nm}$ ;  $I = 60 \text{ mW cm}^{-2}$ ) for 3 hours without prior deoxygenation in water at  $[\text{DMA}]/[\text{water}] = 50/50$  (v/v). A fixed reaction stoichiometry of  $[\text{DMA}]:[\text{CTCPA}]:[\text{ZnPcS}_4^-] = 200:1:0.01$  (50 ppm relative to monomer) was used.

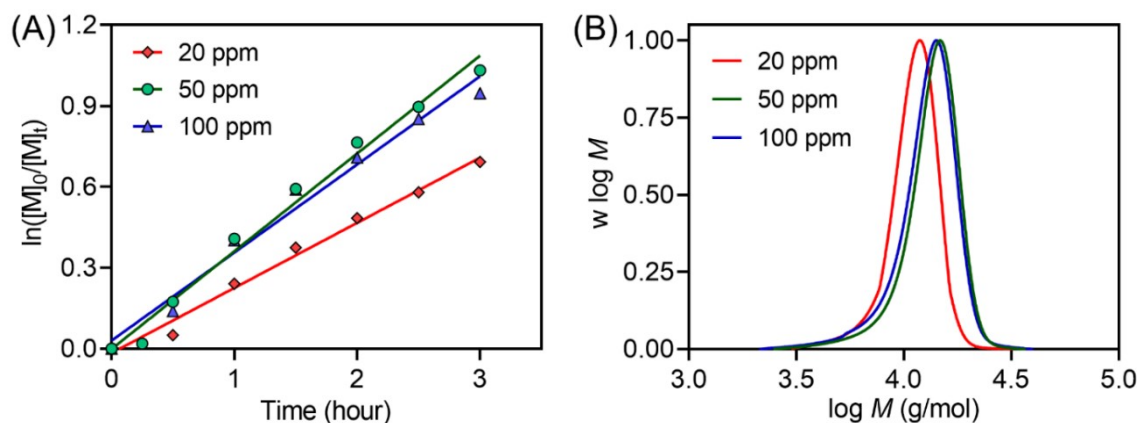

**Figure S11.** (A) Kinetics and (B) MWDs of  $\text{ZnPcS}_4^-$  mediated photo-RAFT polymerization with different PC concentrations (20, 50, and 100 ppm related to monomer) under NIR light irradiation.

**Table S3.**  $\text{ZnPcS}_4^-$  mediated photo-RAFT polymerization with different PC concentrations under 730 nm light.

| # | PC concentration (ppm) | $\alpha$ (%) | $k_p^{\text{app}}$ (hour <sup>-1</sup> ) | $M_{n, \text{theo}}$ (g mol <sup>-1</sup> ) | $M_{n, \text{GPC}}$ (g mol <sup>-1</sup> ) | $\mathcal{D}$ |
|---|------------------------|--------------|------------------------------------------|---------------------------------------------|--------------------------------------------|---------------|
| 1 | 20                     | 50           | 0.24                                     | 10200                                       | 10800                                      | 1.07          |
| 2 | 50                     | 65           | 0.36                                     | 13200                                       | 13000                                      | 1.09          |
| 3 | 100                    | 61           | 0.33                                     | 12400                                       | 12300                                      | 1.10          |

*Note:* were performed at room temperature under the irradiation of NIR light ( $\lambda_{\text{max}} = 730 \text{ nm}$ ;  $I = 60 \text{ mW cm}^{-2}$ ) for 3 hours without prior deoxygenation in water at  $[\text{DMA}]/[\text{water}] = 50/50 \text{ (v/v)}$ . A fixed reaction stoichiometry of  $[\text{DMA}]:[\text{CTCPA}]:[\text{TEOA}] = 200:1:4$  was used.

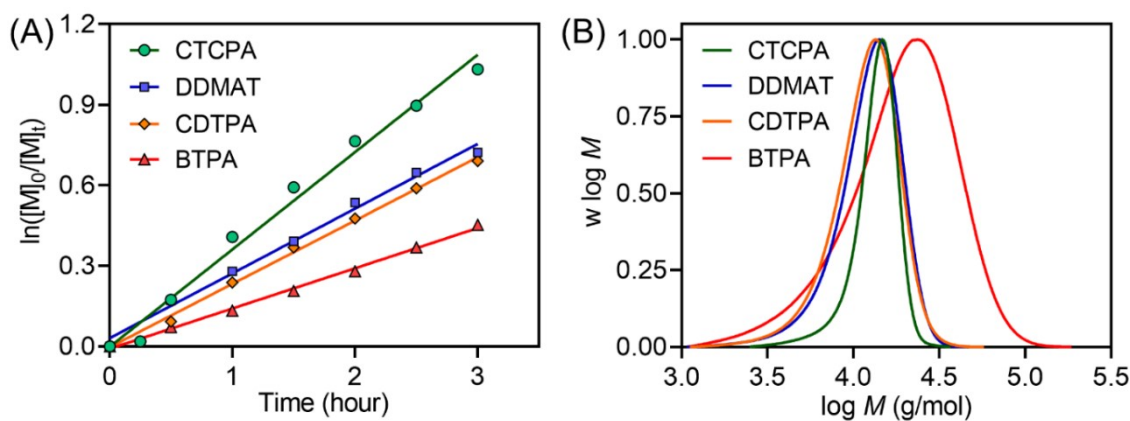

**Figure S12.** (A) Kinetics and (B) MWDs of  $\text{ZnPcS}_4^-$  mediated photo-RAFT polymerization with different RAFT agents under NIR light irradiation ( $\lambda_{\text{max}} = 730 \text{ nm}$ ;  $I = 60 \text{ mW cm}^{-2}$ ).

**Table S4.**  $\text{ZnPcS}_4^-$  mediated photo-RAFT polymerization using different RAFT agents under NIR light.

| # | RAFT agent | $\alpha$ (%) | $k_p^{\text{app}}$<br>( $\text{hour}^{-1}$ ) | $M_{n, \text{theo}}$<br>( $\text{g mol}^{-1}$ ) | $M_{n, \text{GPC}}$<br>( $\text{g mol}^{-1}$ ) | $\bar{D}$ |
|---|------------|--------------|----------------------------------------------|-------------------------------------------------|------------------------------------------------|-----------|
| 1 | CTCPA      | 65           | 0.36                                         | 13200                                           | 13000                                          | 1.09      |
| 2 | CDTPA      | 50           | 0.23                                         | 10300                                           | 11000                                          | 1.20      |
| 3 | DDMAT      | 51           | 0.24                                         | 10500                                           | 11400                                          | 1.20      |
| 4 | BTPA       | 36           | 0.15                                         | 7400                                            | 15000                                          | 1.59      |

*Note:* Reactions were performed at room temperature under the irradiation of NIR light ( $\lambda_{\text{max}} = 730 \text{ nm}$ ;  $I = 60 \text{ mW cm}^{-2}$ ) for 3 hours without prior deoxygenation in water at  $[\text{DMA}]/[\text{water}] = 50/50$  (v/v). A fixed reaction stoichiometry of  $[\text{DMA}]:[\text{RAFT agent}]:[\text{TEOA}]:[\text{ZnPcS}_4^-] = 200:1:4:0.01$  (50 ppm relative to monomer) was used.

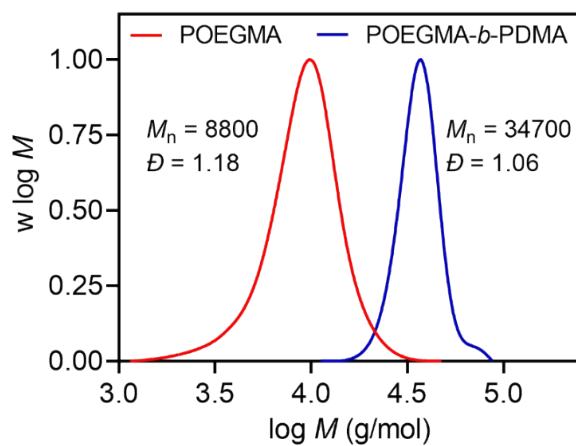

**Figure S13.** Normalized MWDs of POEGMA and its chain extension with DMA using a reaction stoichiometry of [DMA]:[macroRAFT agent]:[TEOA]:[ZnPcS<sub>4</sub><sup>−</sup>] = 400:1:4:0.02 in water under the NIR light irradiation ( $\lambda_{\text{max}} = 730 \text{ nm}$ ;  $I = 60 \text{ mW cm}^{-2}$ ).

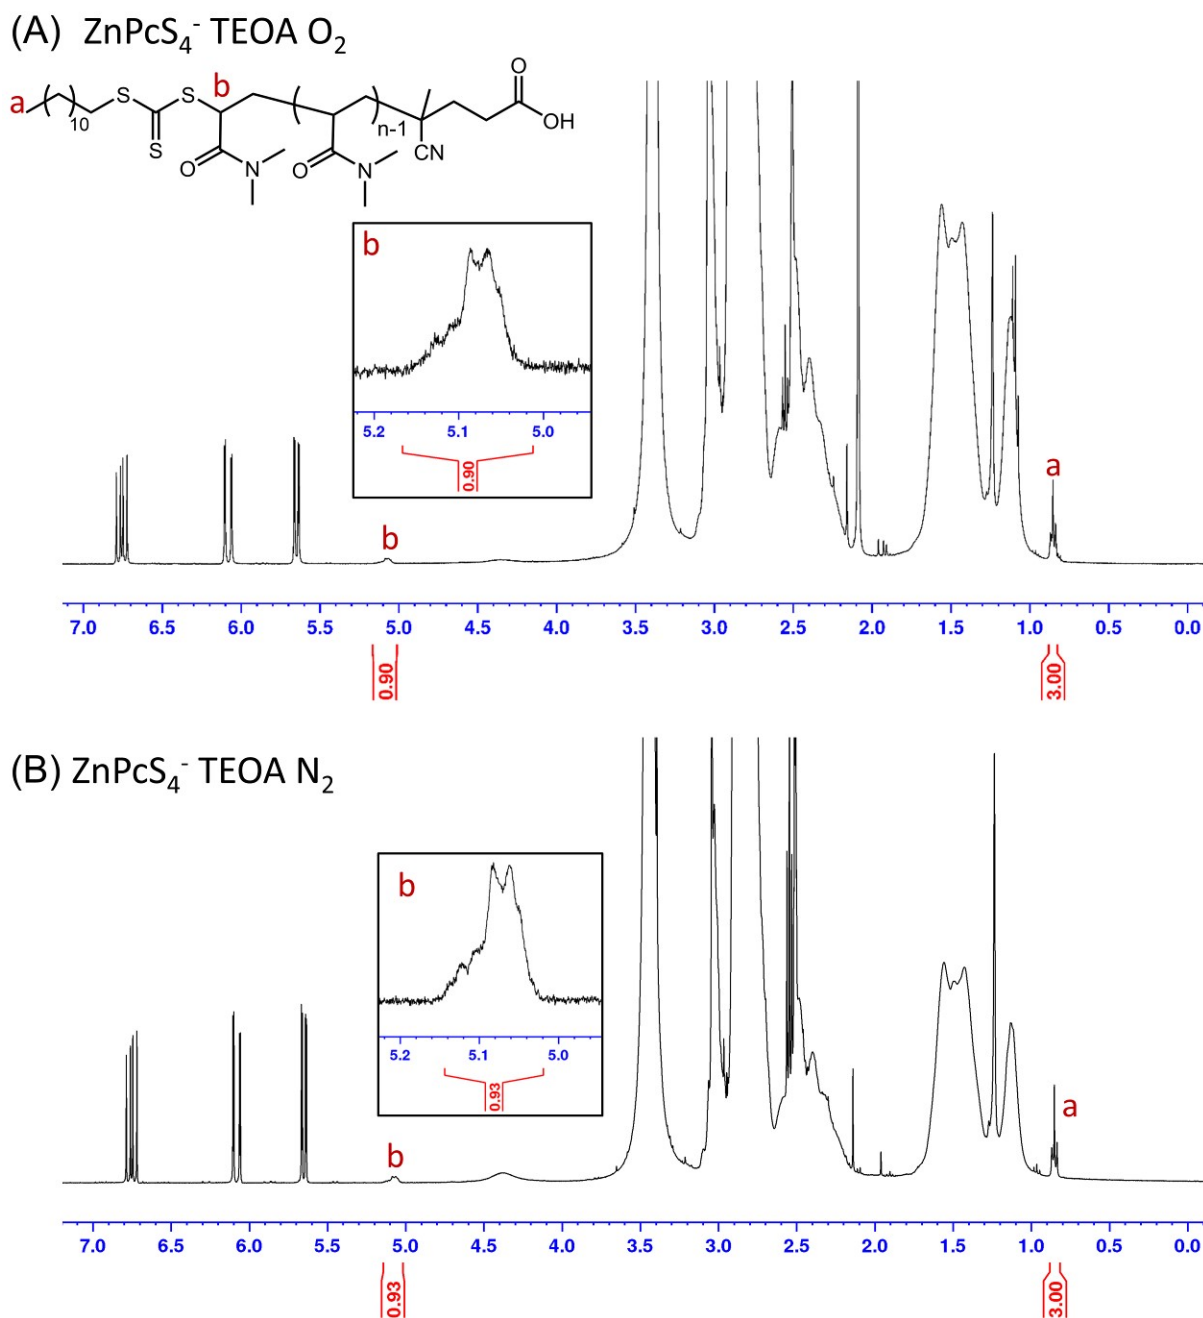

**Figure S14.**  $^1\text{H}$  NMR spectroscopy of PDMA synthesized using CDTPA as the RAFT agent. Reactions were performed at room temperature under the irradiation of NIR light ( $\lambda_{\text{max}} = 730 \text{ nm}$ ;  $I = 60 \text{ mW cm}^{-2}$ ) (A) without prior deoxygenation (monomer conversion = 95%) and (B) after deoxygenation (monomer conversion = 93%) in water at  $[\text{DMA}]/[\text{water}] = 50/50 \text{ (v/v)}$  using a fixed reaction stoichiometry of  $[\text{DMA}]:[\text{CDTPA}]:[\text{TEOA}]:[\text{ZnPcS}_4^-] = 100:1:4:0.005$  (50 ppm relative to monomer).

**Table S5.**  $\text{ZnPcS}_4^-$  mediated photo-RAFT polymerization with different targeted DPs under the NIR light irradiation.

|   | DP  | $\alpha$ (%) | $M_{n, \text{theo}}$<br>( $\text{g mol}^{-1}$ ) | $M_{n, \text{GPC}}$<br>( $\text{g mol}^{-1}$ ) | $\bar{D}$ |
|---|-----|--------------|-------------------------------------------------|------------------------------------------------|-----------|
| 1 | 100 | 68           | 7000                                            | 7000                                           | 1.14      |
| 2 | 200 | 84           | 17000                                           | 16800                                          | 1.11      |
| 3 | 400 | 80           | 32000                                           | 26700                                          | 1.09      |
| 4 | 800 | 57           | 45500                                           | 38400                                          | 1.13      |

*Note:* Reactions were performed at room temperature under the irradiation of NIR light ( $\lambda_{\text{max}} = 730 \text{ nm}$ ;  $I = 60 \text{ mW cm}^{-2}$ ) for 5 hours without prior deoxygenation in water at  $[\text{DMA}]/[\text{water}] = 50/50$  (v/v). A fixed reaction stoichiometry of  $[\text{CTCPA}]:[\text{TEOA}]:[\text{ZnPcS}_4^-] = 1:4:0.01$  (50 ppm relative to monomer) was used.

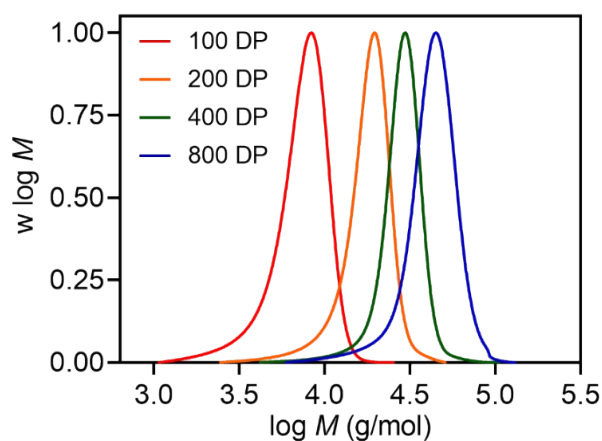

**Figure S15.** MWDs of  $\text{ZnPcS}_4^-$  mediated photo-RAFT polymerization with different targeted DPs (100, 200, 400, and 800) under the NIR light irradiation for 5 hours.

**Table S6.** ZnPcS<sub>4</sub><sup>−</sup> mediated photo-RAFT polymerization with various monomers.

| #              | Monomer | $\alpha$ (%) | $M_{n, \text{theo}}$<br>(g mol <sup>−1</sup> ) | $M_{n, \text{GPC}}$<br>(g mol <sup>−1</sup> ) | $\bar{D}$ |
|----------------|---------|--------------|------------------------------------------------|-----------------------------------------------|-----------|
| 1              | DEA     | 53           | 13800                                          | 10600                                         | 1.21      |
| 2              | HEA     | 51           | 12100                                          | 9500                                          | 1.25      |
| 3 <sup>a</sup> | OEGA    | 77           | 37300                                          | 23600                                         | 1.33      |
| 4 <sup>a</sup> | OEGMA   | 72           | 21900                                          | 16100                                         | 1.26      |

*Note:* *N,N*-diethylacrylamide (DEA), 2-hydroxyethyl acrylate (HEA), Oligo(ethylene glycol) methyl ether acrylate (OEGA,  $M_n = 300$  g mol<sup>−1</sup>) and Oligo(ethylene glycol) methyl ether methacrylate (OEGMA,  $M_n = 480$  g mol<sup>−1</sup>) were used as monomers in this work. Reactions were performed at room temperature under the irradiation of NIR light ( $\lambda_{\text{max}} = 730$  nm;  $I = 60$  mW cm<sup>−2</sup>) for 3 hours without prior deoxygenation in water at [monomer]/[water] = 50/50 (v/v). A fixed reaction stoichiometry of [monomer]:[CTCPA]:[TEOA]:[ZnPcS<sub>4</sub><sup>−</sup>] = 200:1:4:0.01 (50 ppm relative to monomer) was used.

<sup>a</sup>A reaction stoichiometry of [monomer]:[CTCPA]:[TEOA]:[ZnPcS<sub>4</sub><sup>−</sup>] = 100:1:2:0.05 (50 ppm relative to monomer) was used.

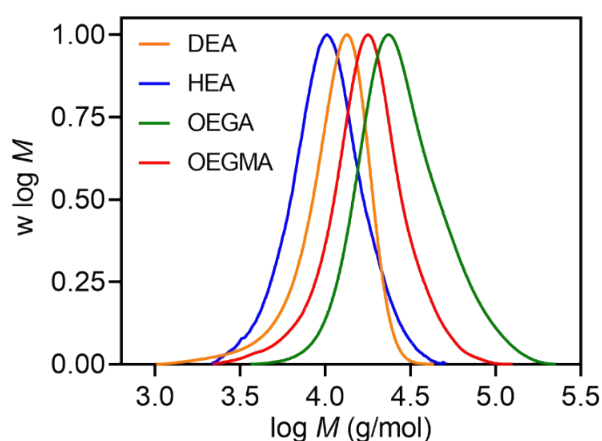**Figure S16.** Normalized MWDs of ZnPcS<sub>4</sub><sup>−</sup> mediated photo-RAFT polymerization using various monomers, including acrylamide, acrylate, and methacrylate.

*Note:* *N,N*-diethylacrylamide (DEA), 2-hydroxyethyl acrylate (HEA), oligo(ethylene glycol) methyl ether acrylate (OEGA,  $M_n = 300$  g mol<sup>−1</sup>) and oligo(ethylene glycol) methyl ether methacrylate (OEGMA,  $M_n = 480$  g mol<sup>−1</sup>).

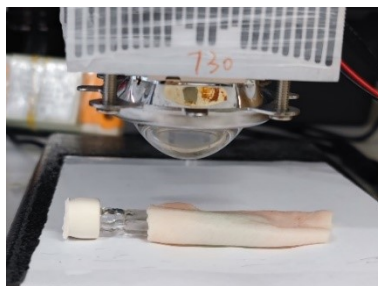

**Figure S17.** Experimental set-up of photo-RAFT polymerization catalyzed by  $\text{ZnPcS}_4^-$  under NIR light ( $\lambda_{\text{max}} = 730 \text{ nm}$ ;  $I = 60 \text{ mW cm}^{-2}$ ) irradiation passing through 1.5 mm pig skin.

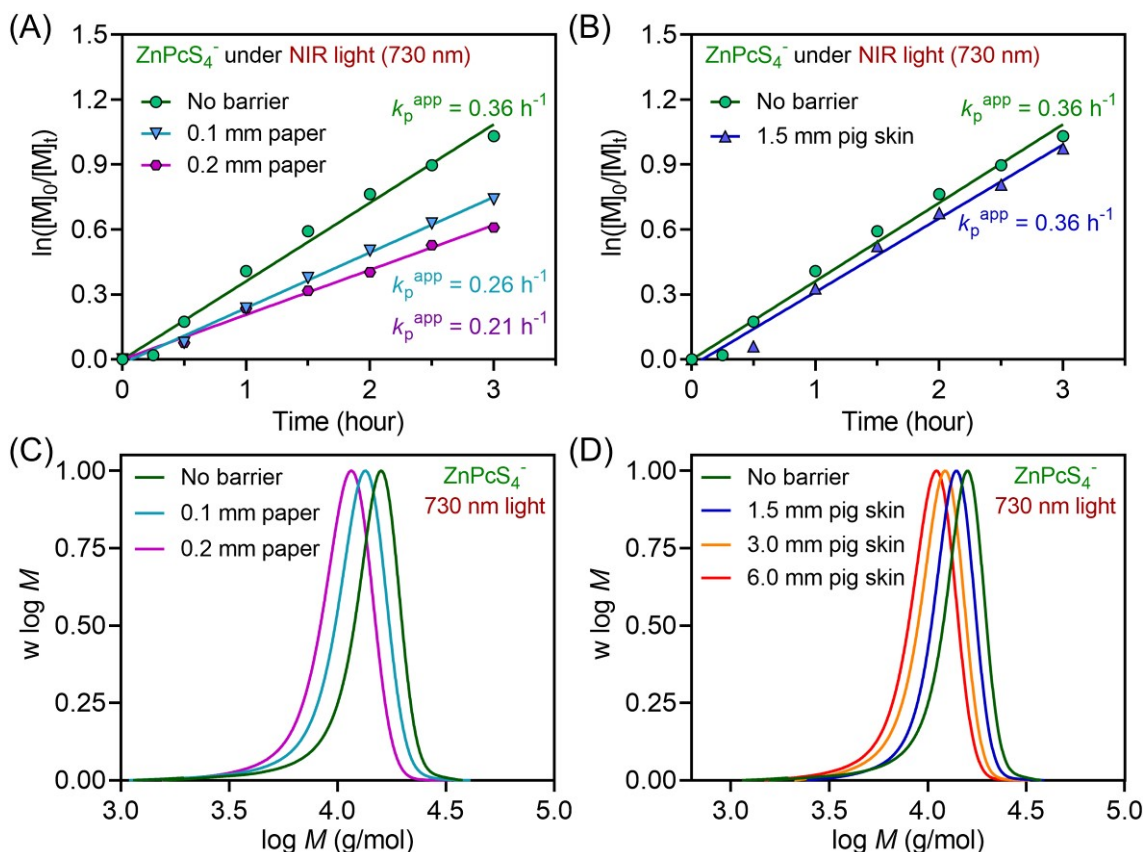

**Figure S18.** (A–B)  $\ln([M]_0/[M]_t)$  versus irradiation time plots of  $\text{ZnPcS}_4^-$  mediated photo-RAFT under NIR light ( $\lambda_{\text{max}} = 730 \text{ nm}$ ;  $I = 60 \text{ mW cm}^{-2}$ ) irradiation passing through various thicknesses of (A) paper and (B) pig skin with a reaction stoichiometry of  $[\text{DMA}]:[\text{CTCPA}]:[\text{TEOA}]:[\text{ZnPcS}_4^-] = 200:1:4:0.01$  at  $[\text{DMA}]/[\text{water}] = 50/50 \text{ (v/v)}$  without deoxygenation. (C–D) MWDs of synthesized PDMA by  $\text{ZnPcS}_4^-$  mediated photo-RAFT under NIR light ( $\lambda_{\text{max}} = 730 \text{ nm}$ ;  $I = 60 \text{ mW cm}^{-2}$ ) irradiation for 3 hours passing through various thicknesses of (C) paper and (D) pig skin.

**Table S7.** ZnPcS<sub>4</sub><sup>−</sup> mediated photo-RAFT polymerization under the NIR light irradiation passing through various barriers.

| # | Barrier         | $\alpha$ (%) | $k_p^{\text{app}}$<br>(hour <sup>−1</sup> ) | $M_{n, \text{theo}}$<br>(g mol <sup>−1</sup> ) | $M_{n, \text{GPC}}$<br>(g mol <sup>−1</sup> ) | $\bar{D}$ |
|---|-----------------|--------------|---------------------------------------------|------------------------------------------------|-----------------------------------------------|-----------|
| 1 | no              | 65           | 0.36                                        | 13200                                          | 13000                                         | 1.09      |
| 2 | 0.1 mm paper    | 51           | 0.26                                        | 10400                                          | 10900                                         | 1.13      |
| 3 | 0.2 mm paper    | 44           | 0.21                                        | 9000                                           | 9600                                          | 1.12      |
| 4 | 1.5 mm pig skin | 62           | 0.34                                        | 12600                                          | 12300                                         | 1.09      |
| 5 | 3.0 mm pig skin | 53           | 0.27                                        | 10800                                          | 10600                                         | 1.10      |
| 6 | 6.0 mm pig skin | 45           | 0.21                                        | 9200                                           | 9100                                          | 1.11      |

*Note:* Reactions were irradiated by NIR light ( $\lambda_{\text{max}} = 730 \text{ nm}$ ;  $I = 60 \text{ mW cm}^{-2}$ ) passing through various barriers for 3 hours at room temperature without prior deoxygenation in water at [DMA]/[water] = 50/50 (v/v). A fixed reaction stoichiometry of [DMA]:[CTCPA]:[TEOA]:[ZnPcS<sub>4</sub><sup>−</sup>] = 200:1:4:0.01 (50 ppm relative to monomer) was used.

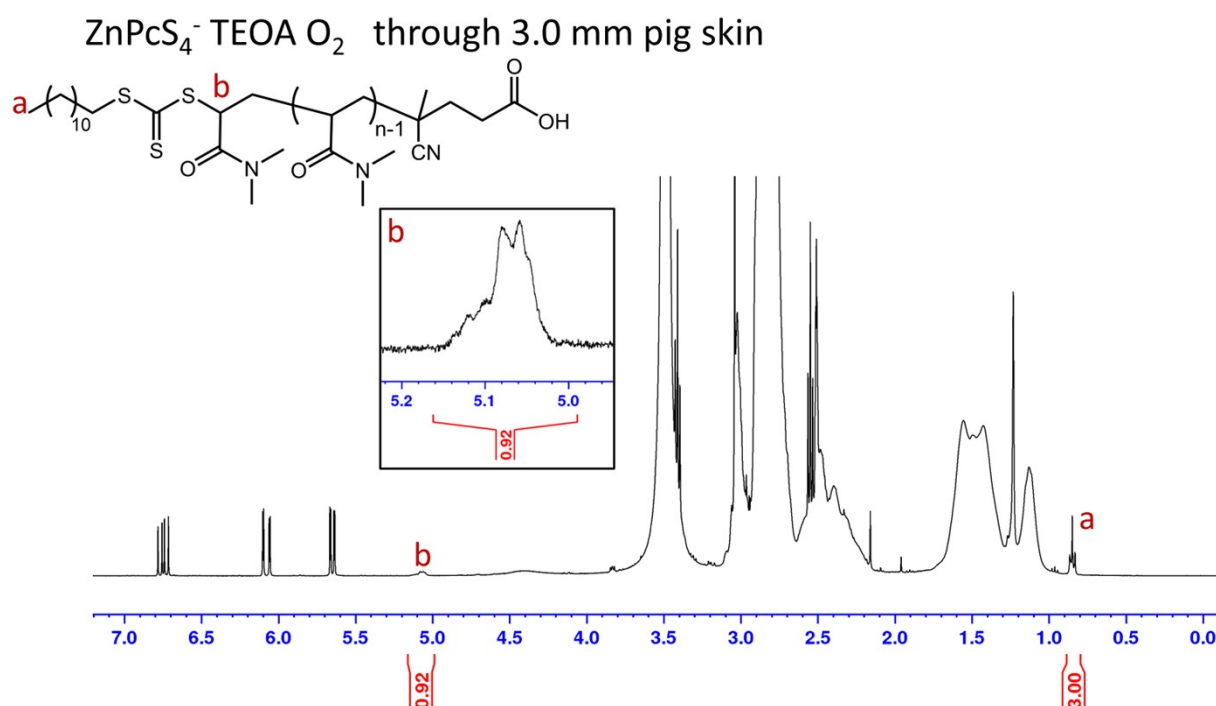

**Figure S19.** <sup>1</sup>H NMR spectroscopy of PDMA synthesized using CDTPA as the RAFT agent. Reactions were performed at room temperature under the irradiation of NIR light ( $\lambda_{\text{max}} = 730 \text{ nm}$ ;  $I = 60 \text{ mW cm}^{-2}$ ) passing through 3.0 mm pig skin (A) without prior deoxygenation (monomer conversion = 96%) in water at [DMA]/[water] = 50/50 (v/v) using a fixed reaction stoichiometry of [DMA]:[CDTPA]:[TEOA]:[ZnPcS<sub>4</sub><sup>−</sup>] = 100:1:4:0.005 (50 ppm relative to monomer).

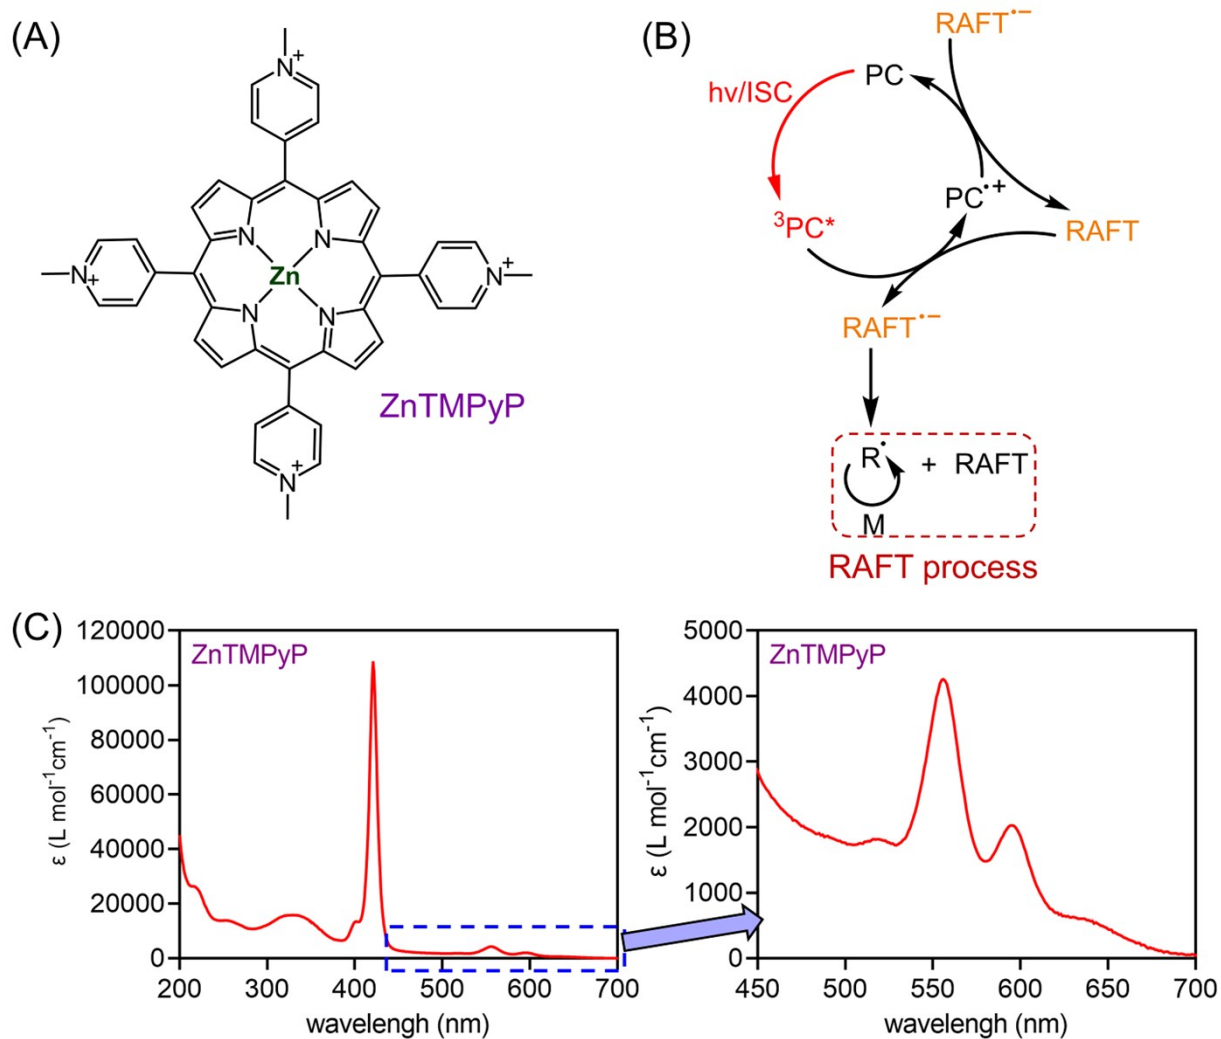

**Figure S20.** (A) Chemical structure of zinc meso-tetra(*N*-methyl-4-pyridyl) porphine tetrachloride (ZnTMPyP) (B) Mechanism of PET-RAFT polymerization via an oxidative quenching pathway (OQP) using ZnTMPyP as the PC. (C) UV-vis spectrum of ZnTMPyP in water.

**Table S8.** ZnTMPyP mediated photo-RAFT polymerization under the violet and green light irradiation passing through 3.0 mm pig skin.

| # | Light irradiation wavelength (nm) | 3.0 mm pig skin barrier | $k_p^{app}$ (hour <sup>-1</sup> ) | $M_{n,theo}$ (g mol <sup>-1</sup> ) | $M_{n, GPC}$ (g mol <sup>-1</sup> ) | $\bar{D}$ |
|---|-----------------------------------|-------------------------|-----------------------------------|-------------------------------------|-------------------------------------|-----------|
| 1 | Violet (405 nm)                   | no                      | 6.30                              | 14200                               | 16100                               | 1.13      |
| 2 | Violet (405 nm)                   | yes                     | 0                                 | -                                   | -                                   | -         |
| 3 | Green (530 nm)                    | no                      | 0.93                              | 13400                               | 13600                               | 1.15      |
| 4 | Green (530 nm)                    | yes                     | 0.07                              | 9000                                | 9600                                | 1.18      |

Note: Reactions were irradiated by violet ( $\lambda_{max} = 405$  nm;  $I_0 = 45$  mW cm<sup>-2</sup>) and green light ( $\lambda_{max} = 530$  nm;  $I_0 = 72$  mW cm<sup>-2</sup>) passing through 3.0 mm pig skin for at room temperature without prior deoxygenation in water at [DMA]/[water] = 50/50 (v/v). A fixed reaction stoichiometry of [DMA]:[CTCPA]:[ZnTMPyP] = 200:1:0.01 (50 ppm relative to monomer) was used.

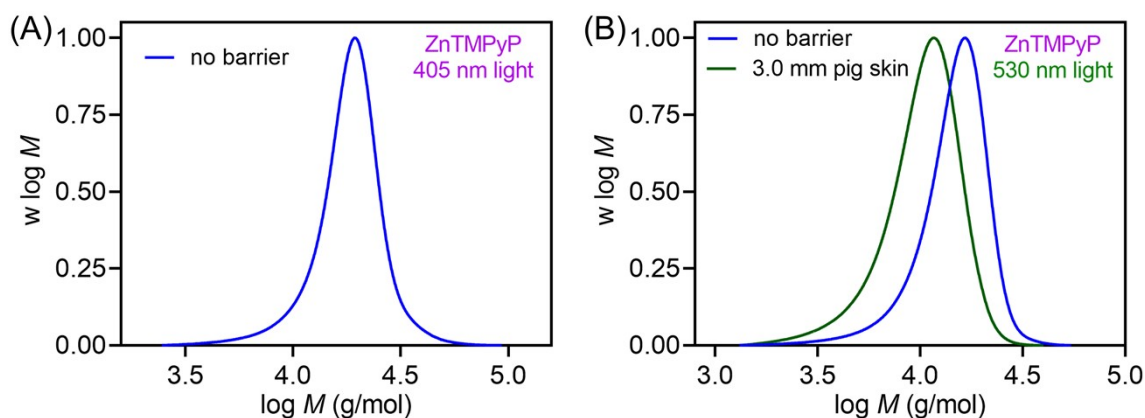

**Figure S21.** MWDs of synthesized PDMA by ZnTMPyP mediated photo-RAFT under violet ( $\lambda_{max} = 405$  nm;  $I_0 = 45$  mW cm<sup>-2</sup>) and green ( $\lambda_{max} = 530$  nm;  $I_0 = 72$  mW cm<sup>-2</sup>) light irradiation in the (A) absence and (B) presence of 3.0 mm pig skin barrier.

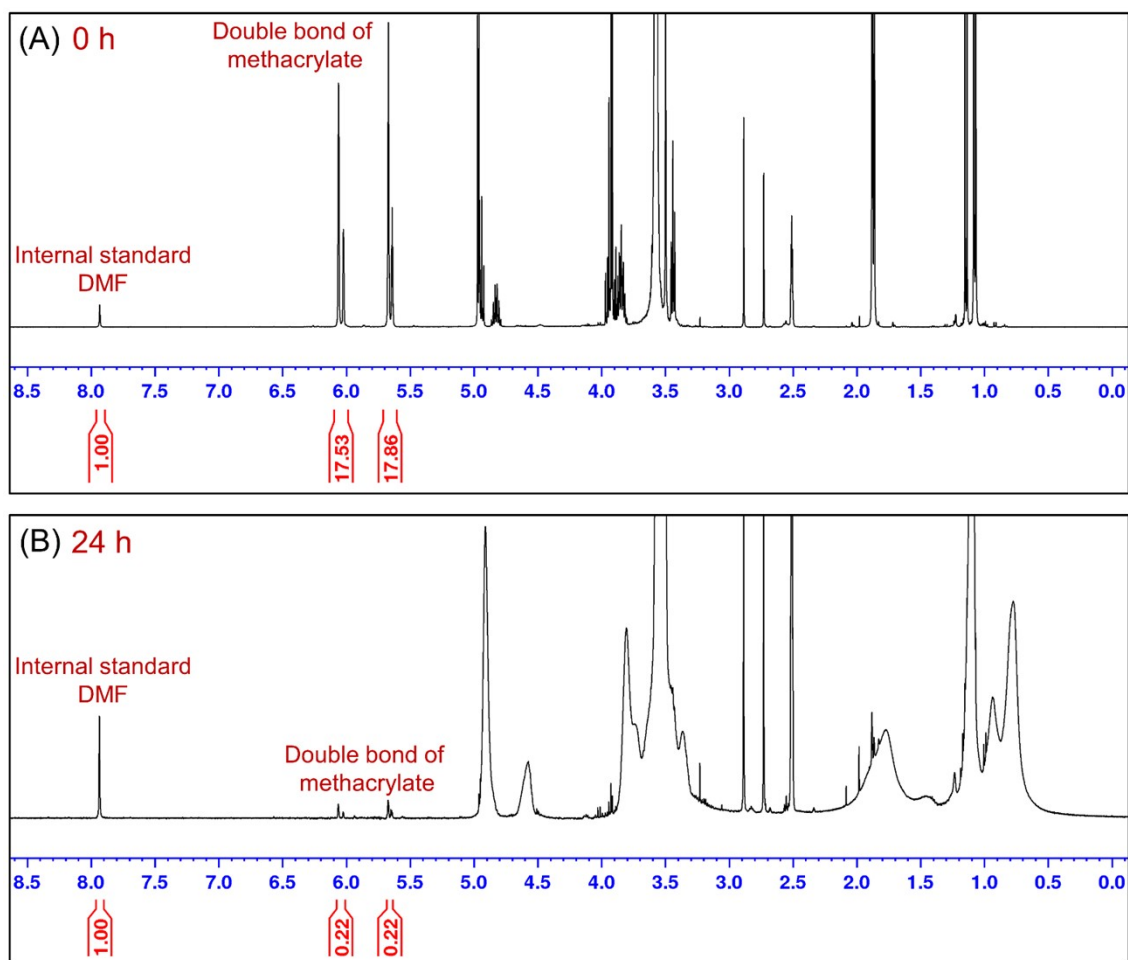

**Figure S22.**  $^1\text{H}$  NMR spectra of crude photo-RAFT dispersion polymerization at different time points. Monomer conversions of dispersion photopolymerizations of HPMA were determined by  $^1\text{H}$  NMR spectroscopy using DMF as the internal standard. Polymerizations were performed under the irradiation of NIR light for 24 hours without prior deoxygenation in water with a fixed reaction stoichiometry of  $[\text{HPMA}]:[\text{PEG}_{113}\text{-CDTPA}]:[\text{TEOA}]:[\text{ZnPcS}_4^-] = 350:1:4:0.02$  and a total solids content of 20 wt%.

**Table S9.** Photo-RAFT dispersion polymerization catalyzed by  $\text{ZnPcS}_4^-$  with various ratios of TEOA.

| # | [TEOA]:[RAFT] | $\alpha$ (%) | $M_{n, \text{theo}}$<br>( $\text{g mol}^{-1}$ ) | $M_{n, \text{GPC}}$<br>( $\text{g mol}^{-1}$ ) | $\bar{D}$ |
|---|---------------|--------------|-------------------------------------------------|------------------------------------------------|-----------|
| 1 | 1             | 4            | 7400                                            | 10100                                          | 1.07      |
| 2 | 2             | 8            | 10800                                           | 11300                                          | 1.12      |
| 3 | 4             | 99           | 55300                                           | 73100                                          | 1.37      |
| 4 | 8             | 99           | 55300                                           | 74000                                          | 1.39      |

*Note:* Dispersion photopolymerizations were performed at room temperature under the irradiation of NIR light ( $\lambda_{\text{max}} = 730 \text{ nm}$ ;  $I = 60 \text{ mW cm}^{-2}$ ) for 24 hours without prior deoxygenation using HPMA as the monomer at a total solids content of 20 wt% in water. A fixed reaction stoichiometry of  $[\text{HPMA}]:[\text{PEG}_{113}\text{-CDTPA}]:[\text{TEOA}]:[\text{ZnPcS}_4^-] = 350:1:4:0.02$  was used.

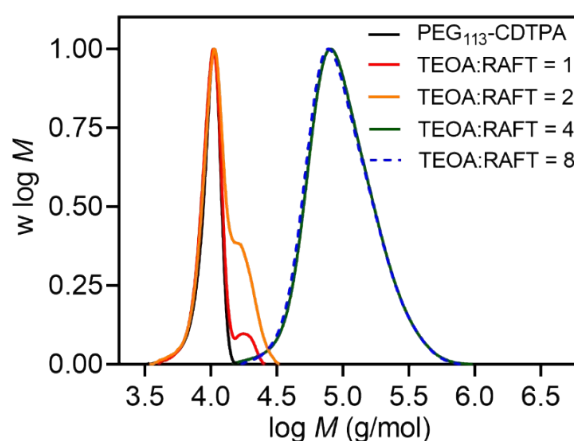

**Figure S23.** MWDs of synthesized  $\text{PEG}_{113}\text{-}b\text{-PHPMA}$  in the optimization experiments with various ratios (1, 2, 4, and 8) of TEOA related to RAFT agent using  $\text{ZnPcS}_4^-$  as the photocatalyst. Polymerizations were performed under NIR light for 24 hours without prior deoxygenation in water with a fixed reaction stoichiometry of  $[\text{HPMA}]:[\text{PEG}_{113}\text{-CDTPA}]:[\text{ZnPcS}_4^-] = 350:1:0.02$  and a total solids content of 20 wt%.

**Table S10.** Evolution of DLS data of self-assembled PEG<sub>113</sub>-*b*-PHPMA polymeric nanoparticles synthesized by ZnPcS<sub>4</sub><sup>−</sup> mediated photo-RAFT dispersion polymerization.

| # | Irradiation time<br>(hour) | Monomer<br>conversion (%) | DLS D <sub>h</sub> (nm) | DLS PDI |
|---|----------------------------|---------------------------|-------------------------|---------|
| 1 | 5                          | 43                        | 34                      | 0.22    |
| 2 | 6                          | 78                        | 147                     | 0.19    |
| 3 | 7                          | 92                        | 229                     | 0.22    |

*Note:* Polymerizations were performed under NIR light ( $\lambda_{\text{max}} = 730 \text{ nm}$ ;  $60 \text{ mW cm}^{-2}$ ) for 24 hours without prior deoxygenation using a fixed reaction stoichiometry of [HPMA]:[PEG<sub>113</sub>-CDTPA]:[TEOA]:[ZnPcS<sub>4</sub><sup>−</sup>] = 350:1:4:0.02 in water and a total solids content of 20 wt%.

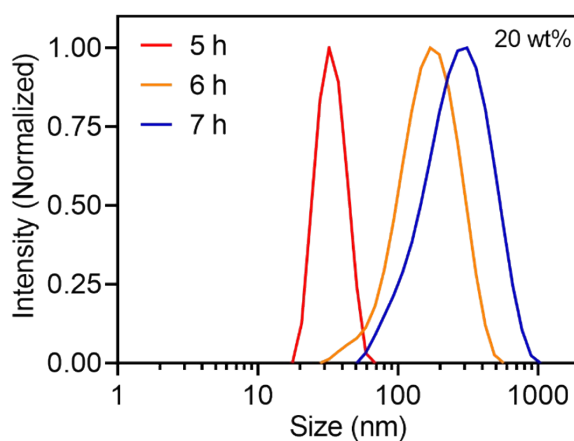

**Figure S24.** DLS derived intensity-based size distributions of self-assembled PEG<sub>113</sub>-*b*-PHPMA at different irradiation times (5, 6, and 7 hours) in **Table S8**.

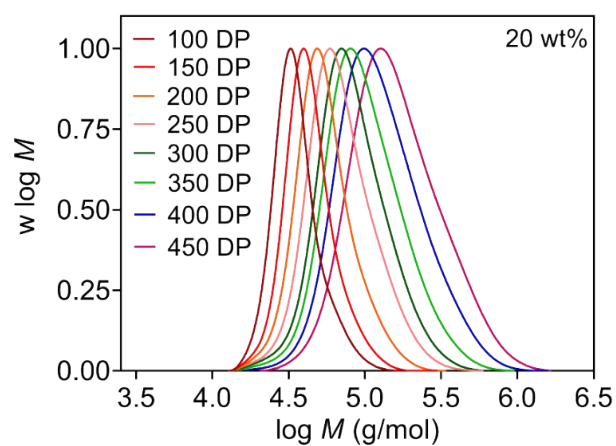

**Figure S25.** MWDs of PEG<sub>113</sub>-*b*-PHPMA synthesized by ZnPcS<sub>4</sub><sup>−</sup> mediated photo-RAFT dispersion polymerization of HPMa. Polymerizations were conducted under NIR light irradiation ( $\lambda_{\text{max}} = 730 \text{ nm}$ ;  $60 \text{ mW cm}^{-2}$ ) for 24 hours without prior deoxygenation in water with a fixed reaction stoichiometry of [PEG<sub>113</sub>-CDTPA]:[TEOA]:[ZnPcS<sub>4</sub><sup>−</sup>] = 1:4:0.02 and a total solids content of 20 wt%.

**Table S11.**  $\text{ZnPcS}_4^-$  mediated photo-RAFT dispersion polymerization of HPMA with varying targeted DPs at a total solids content of 10 wt%.

| # | DPs | $\alpha$ (%) | $M_{n, \text{theo}}$<br>( $\text{g mol}^{-1}$ ) | $M_{n, \text{GPC}}$<br>( $\text{g mol}^{-1}$ ) | $\bar{D}$ | Morphology<br>(Major/Minor) |
|---|-----|--------------|-------------------------------------------------|------------------------------------------------|-----------|-----------------------------|
| 1 | 100 | 99           | 19700                                           | 26000                                          | 1.11      | S                           |
| 2 | 200 | 96           | 33100                                           | 42700                                          | 1.19      | S                           |
| 3 | 300 | 94           | 46000                                           | 55800                                          | 1.33      | S                           |
| 4 | 400 | 91           | 57900                                           | 69800                                          | 1.39      | S                           |

Note: Polymerizations were conducted under the irradiation of NIR light ( $\lambda_{\text{max}} = 730 \text{ nm}$ ;  $60 \text{ mW cm}^{-2}$ ) for 24 hours without prior deoxygenation in water with a fixed reaction stoichiometry of  $[\text{PEG}_{113}\text{-CDTPA}]:[\text{TEOA}]:[\text{ZnPcS}_4^-] = 1:4:0.02$  and a total solids content of 10 wt%.

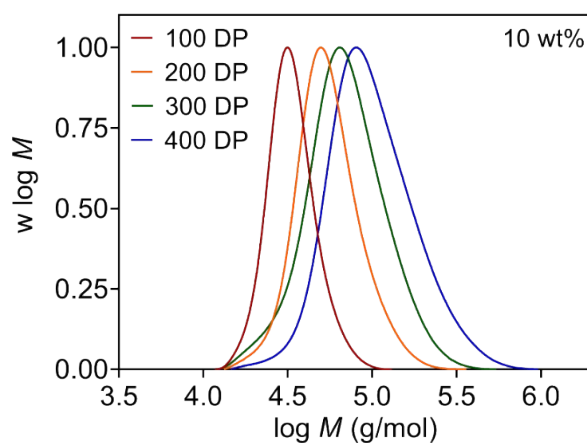

**Figure S26.** MWDs of  $\text{PEG}_{113}\text{-}b\text{-PHPMA}$  with various DPs synthesized by  $\text{ZnPcS}_4^-$  mediated photo-RAFT dispersion polymerization of HPMA at a total solids content of 10 wt%.

**Table S12.**  $\text{ZnPcS}_4^-$  mediated photo-RAFT dispersion polymerization of HPMA with varying target DPs at a total solids content of 15 wt%.

| # | DPs | $\alpha$ (%) | $M_{n, \text{theo}}$<br>( $\text{g mol}^{-1}$ ) | $M_{n, \text{GPC}}$<br>( $\text{g mol}^{-1}$ ) | $\bar{D}$ | Morphology<br>(Major/Minor) |
|---|-----|--------------|-------------------------------------------------|------------------------------------------------|-----------|-----------------------------|
| 1 | 100 | 100          | 19800                                           | 26200                                          | 1.11      | S/W                         |
| 2 | 200 | 98           | 33600                                           | 41700                                          | 1.19      | W/S                         |
| 3 | 300 | 96           | 46900                                           | 59800                                          | 1.32      | W/S                         |
| 4 | 400 | 92           | 58400                                           | 70500                                          | 1.41      | V                           |

Note: Polymerizations were conducted under the irradiation of NIR light ( $\lambda_{\text{max}} = 730 \text{ nm}$ ;  $60 \text{ mW cm}^{-2}$ ) for 24 hours without prior deoxygenation in water with a fixed reaction stoichiometry of  $[\text{PEG}_{113}\text{-CDTPA}]:[\text{TEOA}]:[\text{ZnPcS}_4^-] = 1:4:0.02$  and a total solids content of 15 wt%.

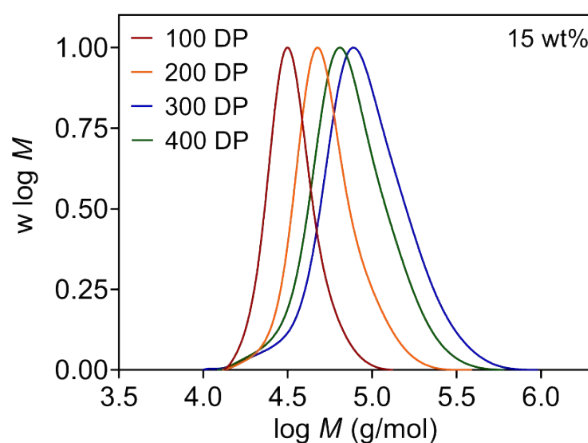

**Figure S27.** MWDs of  $\text{PEG}_{113}\text{-}b\text{-PHPMA}$  with various DPs synthesized by  $\text{ZnPcS}_4^-$  mediated photo-RAFT dispersion polymerization of HPMA at a total solids content of 15 wt%.

**Table S13.** DLS analyses of self-assembled PEG<sub>113</sub>-*b*-PHPMA polymeric nanoparticles synthesized by ZnPcS<sub>4</sub><sup>−</sup> mediated photo-RAFT dispersion polymerization.

| #  | Solid contents (wt%) | DPs | DLS D <sub>h</sub> (nm) | DLS PDI | Morphology (Major/Minor) |
|----|----------------------|-----|-------------------------|---------|--------------------------|
| 1  | 10                   | 100 | 36                      | 0.12    | S                        |
| 2  | 10                   | 200 | 52                      | 0.08    | S                        |
| 3  | 10                   | 300 | 59                      | 0.05    | S                        |
| 4  | 10                   | 400 | 69                      | 0.01    | S                        |
| 5  | 15                   | 100 | 35                      | 0.14    | S/W                      |
| 6  | 15                   | 200 | 74                      | 0.04    | W/S                      |
| 7  | 15                   | 300 | 95                      | 0.13    | W/S                      |
| 8  | 15                   | 400 | 158                     | 0.06    | V                        |
| 9  | 20                   | 100 | 38                      | 0.21    | S/W                      |
| 10 | 20                   | 200 | 156                     | 0.52    | W/S                      |
| 11 | 20                   | 300 | 252                     | 0.23    | W/V                      |
| 12 | 20                   | 400 | 408                     | 0.23    | V                        |

Note: Polymerizations were performed under NIR light ( $\lambda_{\text{max}} = 730 \text{ nm}$ ;  $60 \text{ mW cm}^{-2}$ ) for 24 hours without prior deoxygenation using a fixed reaction stoichiometry of [PEG<sub>113</sub>-CDTPA]:[TEOA]:[ZnPcS<sub>4</sub><sup>−</sup>] = 1:4:0.02 in water. 10, 15, and 20 wt% solid contents were used in the reaction with various targeted DPs including 100, 200, 300, and 400.

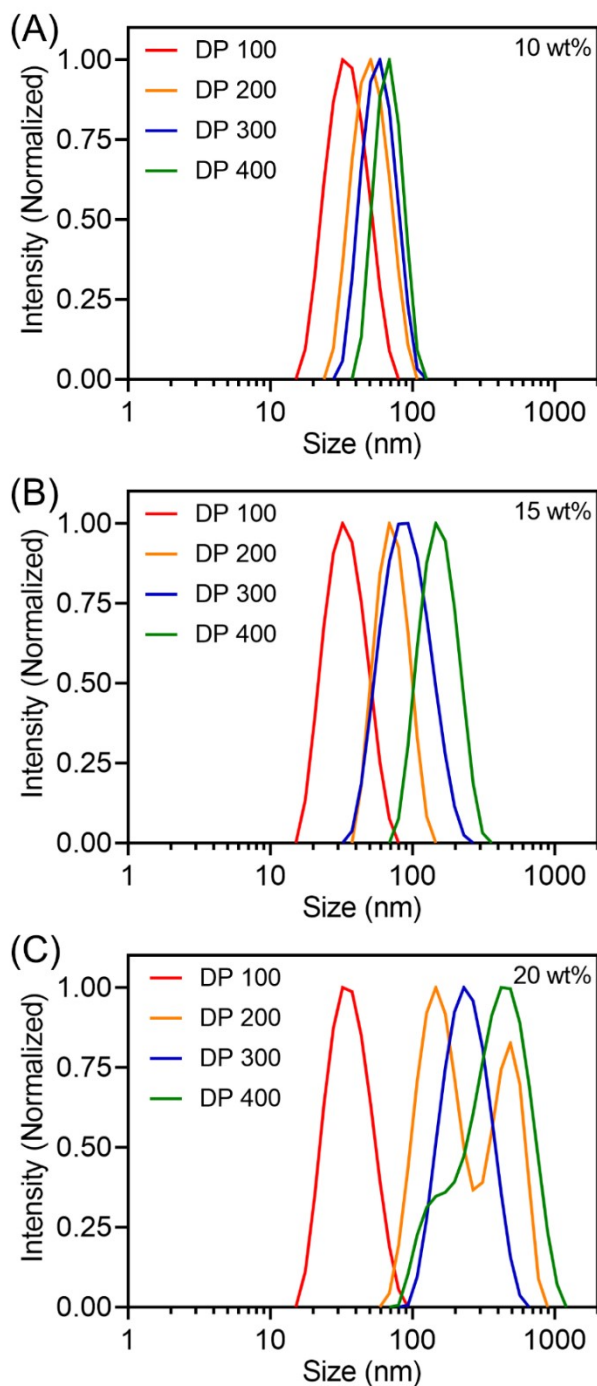

**Figure S28.** DLS derived intensity-based size distributions of self-assembled PEG<sub>113</sub>-*b*-PHPMA in **Table S11** with different solid contents including (A) 10, (B) 15, and (C) 20 wt%.

Note: DLS was only used as an indicative measurement for non-spherical particles as DLS is only appropriate to be employed for spherical nanoparticles.

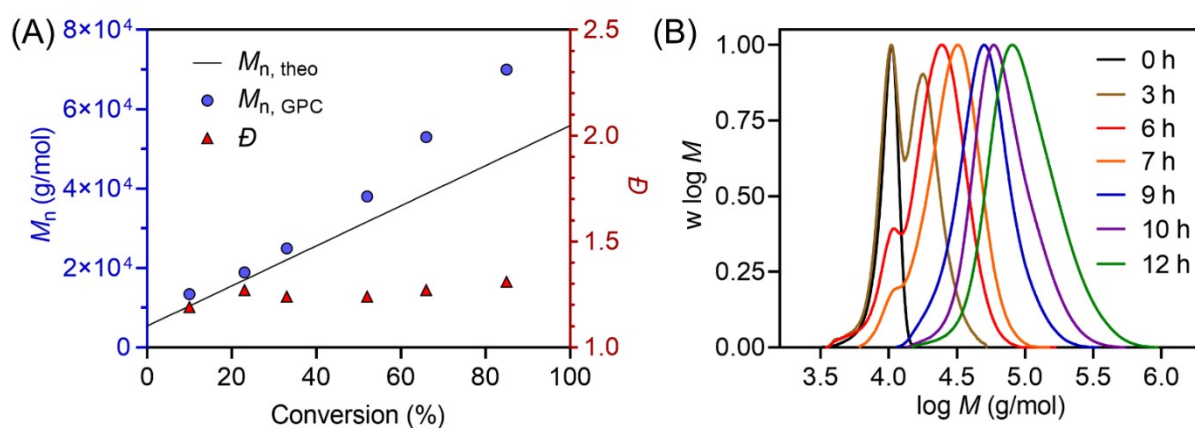

**Figure S29.** (A) Evolution of  $M_n$  and  $\bar{D}$  versus monomer conversion obtained from  $\text{ZnPcS}_4^-$  mediated photo-RAFT dispersion polymerization of HPMA under NIR light ( $\lambda_{\text{max}} = 730 \text{ nm}$ ;  $60 \text{ mW cm}^{-2}$ ) irradiation passing through 6.0 mm pig skin using  $[\text{HPMA}]:[\text{PEG}_{113}\text{-CDTPA}]:[\text{TEOA}]:[\text{ZnPcS}_4^-] = 350:1:4:0.02$  at a total solids content of 20 wt%. (B) Evolution of normalized MWDs versus irradiation time from the reaction in (A).

## DFT CALCULATIONS

### Coordinates and energies of photocatalysts

The coordinates of photocatalysts are optimized at B3LYP-GD3BJ/6-311G\* with the SMD-water solvation model (for C H N elements) and B3LYP-GD3BJ/LANL2TZ with the SMD-water solvation model (for Zn). All coordinates are exhibited as XYZ Cartesian coordinates. Single-point energy calculations were performed at B3LYP-GD3BJ/6-311+G\*\* with the SMD-DMSO solvation model using the optimized coordinates. Zinc tetrasulfonated phthalocyanine ( $\text{ZnPcS}_4^-$ ) was simplified to zinc phthalocyanine. All geometry optimizations and energies were calculated using the GAUSSIAN 09 D01 software package installed in the Katana high-performance computing clusters at the University of New South Wales.

### PC

*Ground state (PC) (-3447.155599)*

|    |             |             |             |
|----|-------------|-------------|-------------|
| C  | 1.11848300  | 2.78888400  | 0.08358300  |
| N  | 0.00000000  | 2.01280400  | 0.18278000  |
| C  | -1.11848300 | 2.78888400  | 0.08358300  |
| C  | -0.70615900 | 4.18549900  | -0.05540100 |
| C  | 0.70615900  | 4.18549900  | -0.05540100 |
| N  | -2.38834600 | 2.38834600  | 0.06253600  |
| C  | -2.78888400 | 1.11848300  | 0.08358300  |
| N  | -2.01280400 | 0.00000000  | 0.18278000  |
| C  | -2.78888400 | -1.11848300 | 0.08358300  |
| C  | -4.18549900 | -0.70615900 | -0.05540100 |
| C  | -4.18549900 | 0.70615900  | -0.05540100 |
| N  | 2.38834600  | 2.38834600  | 0.06253600  |
| C  | 4.18549900  | 0.70615900  | -0.05540100 |
| C  | 4.18549900  | -0.70615900 | -0.05540100 |
| C  | 2.78888400  | -1.11848300 | 0.08358300  |
| N  | 2.01280400  | 0.00000000  | 0.18278000  |
| C  | 2.78888400  | 1.11848300  | 0.08358300  |
| N  | 2.38834600  | -2.38834600 | 0.06253600  |
| N  | 0.00000000  | -2.01280400 | 0.18278000  |
| C  | 1.11848300  | -2.78888400 | 0.08358300  |
| C  | 0.70615900  | -4.18549900 | -0.05540100 |
| C  | -0.70615900 | -4.18549900 | -0.05540100 |
| C  | -1.11848300 | -2.78888400 | 0.08358300  |
| N  | -2.38834600 | -2.38834600 | 0.06253600  |
| Zn | 0.00000000  | 0.00000000  | 0.70585600  |
| C  | 5.37222400  | 1.42203600  | -0.19095400 |
| C  | 6.55846600  | 0.70203900  | -0.31863500 |
| C  | 6.55846600  | -0.70203900 | -0.31863500 |
| C  | 5.37222400  | -1.42203600 | -0.19095400 |
| C  | -1.42203600 | -5.37222400 | -0.19095400 |
| C  | -0.70203900 | -6.55846600 | -0.31863500 |
| C  | 0.70203900  | -6.55846600 | -0.31863500 |
| C  | 1.42203600  | -5.37222400 | -0.19095400 |
| C  | -5.37222400 | 1.42203600  | -0.19095400 |
| C  | -6.55846600 | 0.70203900  | -0.31863500 |

|   |             |             |             |
|---|-------------|-------------|-------------|
| C | -6.55846600 | -0.70203900 | -0.31863500 |
| C | -5.37222400 | -1.42203600 | -0.19095400 |
| C | 1.42203600  | 5.37222400  | -0.19095400 |
| C | 0.70203900  | 6.55846600  | -0.31863500 |
| C | -0.70203900 | 6.55846600  | -0.31863500 |
| C | -1.42203600 | 5.37222400  | -0.19095400 |
| H | 5.37448300  | 2.50597800  | -0.19589600 |
| H | 5.37448300  | -2.50597800 | -0.19589600 |
| H | -2.50597800 | -5.37448300 | -0.19589600 |
| H | 2.50597800  | -5.37448300 | -0.19589600 |
| H | -5.37448300 | 2.50597800  | -0.19589600 |
| H | -5.37448300 | -2.50597800 | -0.19589600 |
| H | 2.50597800  | 5.37448300  | -0.19589600 |
| H | -2.50597800 | 5.37448300  | -0.19589600 |
| H | -7.49850300 | 1.23263300  | -0.42123100 |
| H | -7.49850300 | -1.23263300 | -0.42123100 |
| H | -1.23263300 | 7.49850300  | -0.42123100 |
| H | 1.23263300  | 7.49850300  | -0.42123100 |
| H | 7.49850300  | 1.23263300  | -0.42123100 |
| H | 7.49850300  | -1.23263300 | -0.42123100 |
| H | 1.23263300  | -7.49850300 | -0.42123100 |
| H | -1.23263300 | -7.49850300 | -0.42123100 |

*Triplet state ( $^3PC^*$ ) (-3447.116532)*

|    |             |             |             |
|----|-------------|-------------|-------------|
| C  | 2.77802300  | 1.18208300  | 0.08434100  |
| N  | 1.41519100  | 1.43113200  | 0.18921100  |
| C  | 1.17911900  | 2.75742500  | 0.09076300  |
| C  | 2.46521500  | 3.45660600  | -0.04991000 |
| C  | 3.46672900  | 2.46072200  | -0.05055800 |
| N  | 0.00000000  | 3.39889600  | 0.08192700  |
| C  | -1.17911900 | 2.75742500  | 0.09076300  |
| N  | -1.41519100 | 1.43113200  | 0.18921100  |
| C  | -2.77802300 | 1.18208300  | 0.08434100  |
| C  | -3.46672900 | 2.46072200  | -0.05055800 |
| C  | -2.46521500 | 3.45660600  | -0.04991000 |
| N  | 3.38431300  | 0.00000000  | 0.05644000  |
| C  | 3.46672900  | -2.46072200 | -0.05055800 |
| C  | 2.46521500  | -3.45660600 | -0.04991000 |
| C  | 1.17911900  | -2.75742500 | 0.09076300  |
| N  | 1.41519100  | -1.43113200 | 0.18921100  |
| C  | 2.77802300  | -1.18208300 | 0.08434100  |
| N  | 0.00000000  | -3.39889600 | 0.08192700  |
| N  | -1.41519100 | -1.43113200 | 0.18921100  |
| C  | -1.17911900 | -2.75742500 | 0.09076300  |
| C  | -2.46521500 | -3.45660600 | -0.04991000 |
| C  | -3.46672900 | -2.46072200 | -0.05055800 |
| C  | -2.77802300 | -1.18208300 | 0.08434100  |
| N  | -3.38431300 | 0.00000000  | 0.05644000  |
| Zn | 0.00000000  | 0.00000000  | 0.64379300  |
| C  | 4.80891000  | -2.80302300 | -0.18410500 |
| C  | 5.13155300  | -4.15608200 | -0.30833800 |
| C  | 4.13694200  | -5.14244500 | -0.30761800 |
| C  | 2.78741700  | -4.80037100 | -0.18196900 |

|   |             |             |             |
|---|-------------|-------------|-------------|
| C | -4.80891000 | -2.80302300 | -0.18410500 |
| C | -5.13155300 | -4.15608200 | -0.30833800 |
| C | -4.13694200 | -5.14244500 | -0.30761800 |
| C | -2.78741700 | -4.80037100 | -0.18196900 |
| C | -2.78741700 | 4.80037100  | -0.18196900 |
| C | -4.13694200 | 5.14244500  | -0.30761800 |
| C | -5.13155300 | 4.15608200  | -0.30833800 |
| C | -4.80891000 | 2.80302300  | -0.18410500 |
| C | 4.80891000  | 2.80302300  | -0.18410500 |
| C | 5.13155300  | 4.15608200  | -0.30833800 |
| C | 4.13694200  | 5.14244500  | -0.30761800 |
| C | 2.78741700  | 4.80037100  | -0.18196900 |
| H | 5.58346800  | -2.04493200 | -0.18942800 |
| H | 2.01761200  | -5.56326200 | -0.18667100 |
| H | -5.58346800 | -2.04493200 | -0.18942800 |
| H | -2.01761200 | -5.56326200 | -0.18667100 |
| H | -2.01761200 | 5.56326200  | -0.18667100 |
| H | -5.58346800 | 2.04493200  | -0.18942800 |
| H | 5.58346800  | 2.04493200  | -0.18942800 |
| H | 2.01761200  | 5.56326200  | -0.18667100 |
| H | -4.41890200 | 6.18438500  | -0.40800800 |
| H | -6.17056700 | 4.44950400  | -0.40873900 |
| H | 4.41890200  | 6.18438500  | -0.40800800 |
| H | 6.17056700  | 4.44950400  | -0.40873900 |
| H | 6.17056700  | -4.44950400 | -0.40873900 |
| H | 4.41890200  | -6.18438500 | -0.40800800 |
| H | -4.41890200 | -6.18438500 | -0.40800800 |
| H | -6.17056700 | -4.44950400 | -0.40873900 |

*Anionic radical (PC<sup>•-</sup>) (-3447.280044)*

|   |             |             |             |
|---|-------------|-------------|-------------|
| C | 2.76906200  | 1.18352000  | 0.07339200  |
| N | 1.43616600  | 1.42122500  | 0.15458000  |
| C | 1.18558700  | 2.78269500  | 0.07037700  |
| C | 2.45948100  | 3.46922000  | -0.04445500 |
| C | 3.46145300  | 2.46536700  | -0.04446000 |
| N | 0.00000000  | 3.38548400  | 0.04739100  |
| C | -1.18558700 | 2.78269500  | 0.07037700  |
| N | -1.43616600 | 1.42122500  | 0.15458000  |
| C | -2.76906200 | 1.18352000  | 0.07339200  |
| C | -3.46145300 | 2.46536700  | -0.04446000 |
| C | -2.45948100 | 3.46922000  | -0.04445500 |
| N | 3.40429300  | 0.00000000  | 0.06363300  |
| C | 3.46145300  | -2.46536700 | -0.04446000 |
| C | 2.45948100  | -3.46922000 | -0.04445500 |
| C | 1.18558700  | -2.78269500 | 0.07037700  |
| N | 1.43616600  | -1.42122500 | 0.15458000  |
| C | 2.76906200  | -1.18352000 | 0.07339200  |
| N | 0.00000000  | -3.38548400 | 0.04739100  |
| N | -1.43616600 | -1.42122500 | 0.15458000  |
| C | -1.18558700 | -2.78269500 | 0.07037700  |
| C | -2.45948100 | -3.46922000 | -0.04445500 |
| C | -3.46145300 | -2.46536700 | -0.04446000 |
| C | -2.76906200 | -1.18352000 | 0.07339200  |

|    |             |             |             |
|----|-------------|-------------|-------------|
| N  | -3.40429300 | 0.00000000  | 0.06363300  |
| Zn | 0.00000000  | 0.00000000  | 0.57038200  |
| C  | 4.81087700  | -2.80050500 | -0.15751300 |
| C  | 5.15198700  | -4.14574800 | -0.26362600 |
| C  | 4.15882300  | -5.14319200 | -0.26360300 |
| C  | 2.81075800  | -4.81773500 | -0.15815000 |
| C  | -4.81087700 | -2.80050500 | -0.15751300 |
| C  | -5.15198700 | -4.14574800 | -0.26362600 |
| C  | -4.15882300 | -5.14319200 | -0.26360300 |
| C  | -2.81075800 | -4.81773500 | -0.15815000 |
| C  | -2.81075800 | 4.81773500  | -0.15815000 |
| C  | -4.15882300 | 5.14319200  | -0.26360300 |
| C  | -5.15198700 | 4.14574800  | -0.26362600 |
| C  | -4.81087700 | 2.80050500  | -0.15751300 |
| C  | 4.81087700  | 2.80050500  | -0.15751300 |
| C  | 5.15198700  | 4.14574800  | -0.26362600 |
| C  | 4.15882300  | 5.14319200  | -0.26360300 |
| C  | 2.81075800  | 4.81773500  | -0.15815000 |
| H  | 5.57624400  | -2.03220000 | -0.16114700 |
| H  | 2.05227800  | -5.59285700 | -0.16177100 |
| H  | -5.57624400 | -2.03220000 | -0.16114700 |
| H  | -2.05227800 | -5.59285700 | -0.16177100 |
| H  | -2.05227800 | 5.59285700  | -0.16177100 |
| H  | -5.57624400 | 2.03220000  | -0.16114700 |
| H  | 5.57624400  | 2.03220000  | -0.16114700 |
| H  | 2.05227800  | 5.59285700  | -0.16177100 |
| H  | -4.45316300 | 6.18392300  | -0.34851100 |
| H  | -6.19450800 | 4.43246000  | -0.34885400 |
| H  | 4.45316300  | 6.18392300  | -0.34851100 |
| H  | 6.19450800  | 4.43246000  | -0.34885400 |
| H  | 6.19450800  | -4.43246000 | -0.34885400 |
| H  | 4.45316300  | -6.18392300 | -0.34851100 |
| H  | -4.45316300 | -6.18392300 | -0.34851100 |
| H  | -6.19450800 | -4.43246000 | -0.34885400 |

*Cationic radical (PC<sup>•+</sup>) (-3446.975349)*

|   |             |             |             |
|---|-------------|-------------|-------------|
| C | 1.11544400  | 2.78176600  | 0.09685700  |
| N | 0.00000000  | 2.00628500  | 0.21504400  |
| C | -1.11544400 | 2.78176600  | 0.09685700  |
| C | -0.70424200 | 4.18211900  | -0.06245200 |
| C | 0.70424200  | 4.18211900  | -0.06245200 |
| N | -2.38612500 | 2.38612500  | 0.07370400  |
| C | -2.78176600 | 1.11544400  | 0.09685700  |
| N | -2.00628500 | 0.00000000  | 0.21504400  |
| C | -2.78176600 | -1.11544400 | 0.09685700  |
| C | -4.18211900 | -0.70424200 | -0.06245200 |
| C | -4.18211900 | 0.70424200  | -0.06245200 |
| N | 2.38612500  | 2.38612500  | 0.07370400  |
| C | 4.18211900  | 0.70424200  | -0.06245200 |
| C | 4.18211900  | -0.70424200 | -0.06245200 |
| C | 2.78176600  | -1.11544400 | 0.09685700  |
| N | 2.00628500  | 0.00000000  | 0.21504400  |
| C | 2.78176600  | 1.11544400  | 0.09685700  |

|    |             |             |             |
|----|-------------|-------------|-------------|
| N  | 2.38612500  | -2.38612500 | 0.07370400  |
| N  | 0.00000000  | -2.00628500 | 0.21504400  |
| C  | 1.11544400  | -2.78176600 | 0.09685700  |
| C  | 0.70424200  | -4.18211900 | -0.06245200 |
| C  | -0.70424200 | -4.18211900 | -0.06245200 |
| C  | -1.11544400 | -2.78176600 | 0.09685700  |
| N  | -2.38612500 | -2.38612500 | 0.07370400  |
| Zn | 0.00000000  | 0.00000000  | 0.76920800  |
| C  | 5.35815700  | 1.42282800  | -0.21325600 |
| C  | 6.54763400  | 0.69882100  | -0.35562900 |
| C  | 6.54763400  | -0.69882100 | -0.35562900 |
| C  | 5.35815700  | -1.42282800 | -0.21325600 |
| C  | -1.42282800 | -5.35815700 | -0.21325600 |
| C  | -0.69882100 | -6.54763400 | -0.35562900 |
| C  | 0.69882100  | -6.54763400 | -0.35562900 |
| C  | 1.42282800  | -5.35815700 | -0.21325600 |
| C  | -5.35815700 | 1.42282800  | -0.21325600 |
| C  | -6.54763400 | 0.69882100  | -0.35562900 |
| C  | -6.54763400 | -0.69882100 | -0.35562900 |
| C  | -5.35815700 | -1.42282800 | -0.21325600 |
| C  | 1.42282800  | 5.35815700  | -0.21325600 |
| C  | 0.69882100  | 6.54763400  | -0.35562900 |
| C  | -0.69882100 | 6.54763400  | -0.35562900 |
| C  | -1.42282800 | 5.35815700  | -0.21325600 |
| H  | 5.36009200  | 2.50616700  | -0.21874200 |
| H  | 5.36009200  | -2.50616700 | -0.21874200 |
| H  | -2.50616700 | -5.36009200 | -0.21874200 |
| H  | 2.50616700  | -5.36009200 | -0.21874200 |
| H  | -5.36009200 | 2.50616700  | -0.21874200 |
| H  | -5.36009200 | -2.50616700 | -0.21874200 |
| H  | 2.50616700  | 5.36009200  | -0.21874200 |
| H  | -2.50616700 | 5.36009200  | -0.21874200 |
| H  | -7.48498600 | 1.23079200  | -0.46953300 |
| H  | -7.48498600 | -1.23079200 | -0.46953300 |
| H  | -1.23079200 | 7.48498600  | -0.46953300 |
| H  | 1.23079200  | 7.48498600  | -0.46953300 |
| H  | 7.48498600  | 1.23079200  | -0.46953300 |
| H  | 7.48498600  | -1.23079200 | -0.46953300 |
| H  | 1.23079200  | -7.48498600 | -0.46953300 |
| H  | -1.23079200 | -7.48498600 | -0.46953300 |

### Coordinates and energies of RAFT agent, TEOA, and O<sub>2</sub>

The coordinates of RAFT agent, TEOA, and O<sub>2</sub> are optimized at B3LYP-GD3BJ/6-311G\* with the SMD-water solvation model exhibited as XYZ Cartesian coordinates. Single-point energy calculations were performed at B3LYP-GD3BJ/6-311+G\*\* with the SMD-water solvation model using the optimized coordinates. All geometry optimizations and energies were calculated using the GAUSSIAN 09 D01 software package installed in the Katana high-performance computing clusters at the University of New South Wales.

#### CTCPA

*Ground state (CTCPA) (-1939.523066)*

|   |             |             |             |
|---|-------------|-------------|-------------|
| S | -0.33247500 | 0.31936600  | 1.30579300  |
| S | 0.61714400  | -1.77126900 | -0.71970000 |
| C | 2.31159700  | -1.28619900 | -0.10000100 |
| C | 2.37177600  | -1.47294200 | 1.34852000  |
| N | 2.50562700  | -1.67637400 | 2.47724700  |
| C | 3.23755300  | -2.32814700 | -0.75902400 |
| H | 3.21625200  | -2.20359600 | -1.84221100 |
| H | 4.25957200  | -2.17926600 | -0.41147000 |
| H | 2.93955300  | -3.34595700 | -0.50559900 |
| C | 2.65799900  | 0.15068000  | -0.53271100 |
| H | 2.64972300  | 0.16509600  | -1.62359100 |
| H | 1.88431500  | 0.83379400  | -0.18984100 |
| C | -0.55338900 | -0.64585700 | -0.00638500 |
| C | 4.01165700  | 0.62192800  | -0.00979500 |
| H | 4.07244700  | 0.53833500  | 1.07973800  |
| H | 4.83695000  | 0.02581000  | -0.40572400 |
| C | 4.27971800  | 2.05916100  | -0.36144100 |
| O | 3.52704700  | 2.79797200  | -0.96117600 |
| O | 5.48946800  | 2.45774300  | 0.08020200  |
| H | 5.61946200  | 3.39021300  | -0.15781100 |
| S | -2.03020700 | -0.78751900 | -0.95164700 |
| C | -3.25354800 | 0.15070300  | 0.03733700  |
| H | -3.28926600 | -0.28289700 | 1.03430400  |
| H | -2.91294200 | 1.18161800  | 0.10812600  |
| C | -4.59707400 | 0.05130400  | -0.67628100 |
| H | -4.92877700 | -0.99005600 | -0.74255500 |
| H | -4.53882400 | 0.42526000  | -1.70043000 |
| C | -5.71887900 | 0.80676700  | -0.00753800 |
| O | -6.77109600 | 1.06291200  | -0.55345700 |
| O | -5.45503000 | 1.15017700  | 1.26409700  |
| H | -6.22681400 | 1.61221200  | 1.63179200  |

*Anionic radical (CTCPA<sup>•-</sup>) (-1939.636429)*

|   |            |             |             |
|---|------------|-------------|-------------|
| S | 1.39017800 | -2.39571200 | 1.62770700  |
| S | 2.57029500 | -1.04783400 | -0.84787100 |
| C | 2.30080900 | 0.82629100  | -0.43368800 |
| C | 2.95663300 | 1.07431800  | 0.83898100  |
| N | 3.48539800 | 1.28319300  | 1.84772600  |

|   |             |             |             |
|---|-------------|-------------|-------------|
| C | 3.00669500  | 1.59767900  | -1.55191300 |
| H | 2.46962200  | 1.44619400  | -2.48932100 |
| H | 3.03268100  | 2.66729100  | -1.33249700 |
| H | 4.03638700  | 1.25729100  | -1.67863000 |
| C | 0.79878400  | 1.11325900  | -0.33308500 |
| H | 0.33923800  | 0.81337000  | -1.27579700 |
| H | 0.37768700  | 0.47843700  | 0.44485900  |
| C | 1.29773500  | -1.92500300 | -0.02028700 |
| C | 0.46955700  | 2.57128400  | -0.03044700 |
| H | 0.98964200  | 2.92130200  | 0.86851100  |
| H | 0.77972300  | 3.23936000  | -0.83667400 |
| C | -1.00009000 | 2.78331800  | 0.20891000  |
| O | -1.83675200 | 1.91311800  | 0.33797600  |
| O | -1.30910000 | 4.09419300  | 0.28474700  |
| H | -2.26036400 | 4.18139700  | 0.46024600  |
| S | -0.14637900 | -2.25921900 | -1.02649300 |
| C | -1.55931700 | -1.73607000 | 0.04307900  |
| H | -1.94714500 | -2.59794800 | 0.58358500  |
| H | -1.16308800 | -1.03017700 | 0.76844200  |
| C | -2.63410400 | -1.09229700 | -0.82192900 |
| H | -3.03979900 | -1.80198200 | -1.54944400 |
| H | -2.21535000 | -0.26877900 | -1.40545100 |
| C | -3.81673000 | -0.51745300 | -0.08453900 |
| O | -4.75140300 | 0.03031100  | -0.63432700 |
| O | -3.75261200 | -0.65798600 | 1.25156700  |
| H | -4.54342900 | -0.25290600 | 1.64441000  |

#### TEOA

*Ground state (TEOA)(-518.276192)*

|   |             |             |             |
|---|-------------|-------------|-------------|
| N | -0.00575100 | -0.00285000 | 0.30768300  |
| C | 0.52997100  | -1.31047300 | 0.70983700  |
| C | 0.85766100  | 1.10777700  | 0.73298900  |
| C | -1.39819600 | 0.18075000  | 0.73804800  |
| C | 1.47383600  | -1.93385200 | -0.29828600 |
| C | 0.95775100  | 2.23027800  | -0.27869800 |
| C | -2.42251400 | -0.28292500 | -0.27636600 |
| H | -0.30172600 | -2.00465000 | 0.82127200  |
| H | 1.02568200  | -1.25208100 | 1.69216100  |
| H | 1.86905000  | 0.72932500  | 0.87454100  |
| H | 0.53432700  | 1.51252100  | 1.70493500  |
| H | -1.57707800 | 1.24372900  | 0.89417300  |
| H | -1.58526900 | -0.31392900 | 1.70449000  |
| H | 0.96712000  | -2.01594500 | -1.26643300 |
| H | 1.31603100  | 1.82425000  | -1.23153300 |
| H | -2.24400900 | 0.23166300  | -1.22732900 |
| O | -2.33878400 | -1.70381200 | -0.46027900 |
| H | -2.96634100 | -1.94758900 | -1.15049000 |
| H | -3.42346000 | -0.00944200 | 0.08165800  |
| H | 1.73179500  | -2.94607000 | 0.03906400  |
| O | 2.66531300  | -1.14444500 | -0.43076500 |
| H | 3.19236200  | -1.52640800 | -1.14213700 |
| O | -0.31992200 | 2.85804500  | -0.46116600 |

|   |             |            |             |
|---|-------------|------------|-------------|
| H | -0.23223700 | 3.50107700 | -1.17418400 |
| H | 1.69010000  | 2.96585700 | 0.07857200  |

*Cationic radical (TEOA<sup>•+</sup>) (-518.094921)*

|   |             |             |             |
|---|-------------|-------------|-------------|
| N | -0.00111800 | 0.00123800  | 0.89780300  |
| C | -1.34468400 | 0.53601600  | 0.87610900  |
| H | -1.90553800 | 0.06579400  | 1.68906200  |
| H | -1.28590700 | 1.60609900  | 1.05397000  |
| C | 0.20958600  | -1.42855700 | 0.86927000  |
| H | 0.89636000  | -1.68397200 | 1.68099500  |
| H | -0.74593500 | -1.91689000 | 1.04022600  |
| C | 1.12984400  | 0.90000900  | 0.89521800  |
| H | 0.98349800  | 1.62670500  | 1.69920800  |
| H | 2.02854900  | 0.32200300  | 1.09267300  |
| C | 0.81738000  | -1.96504800 | -0.45082800 |
| H | 0.27034100  | -1.57436300 | -1.31052900 |
| C | 1.32319600  | 1.68638800  | -0.42609800 |
| H | 1.31371800  | 1.00625900  | -1.27886600 |
| C | -2.12229000 | 0.28865400  | -0.43988900 |
| H | -1.51153000 | 0.56861500  | -1.29943100 |
| H | -2.98148300 | 0.96032300  | -0.38935200 |
| H | 2.31752600  | 2.13015200  | -0.34433400 |
| H | 0.67202600  | -3.04635600 | -0.40751800 |
| O | -2.61706500 | -1.03279100 | -0.56775200 |
| H | -2.03271700 | -1.54109900 | -1.14034600 |
| O | 0.38983400  | 2.73786300  | -0.60013400 |
| H | -0.28660600 | 2.46531300  | -1.22972500 |
| O | 2.20766600  | -1.72083600 | -0.57193000 |
| H | 2.35385400  | -0.97591500 | -1.16482500 |

Oxygen

*Triplet state (O<sub>2</sub>) (-150.371874)*

|   |            |            |             |
|---|------------|------------|-------------|
| O | 0.00000000 | 0.00000000 | 0.60227800  |
| O | 0.00000000 | 0.00000000 | -0.60227800 |

*Singlet state (<sup>1</sup>O<sub>2</sub>) (-150.312597)*

|   |            |            |             |
|---|------------|------------|-------------|
| O | 0.00000000 | 0.00000000 | 0.60251800  |
| O | 0.00000000 | 0.00000000 | -0.60251800 |

*Anionic radical (O<sub>2</sub><sup>•-</sup>) (-150.519608)*

|   |            |            |             |
|---|------------|------------|-------------|
| O | 0.00000000 | 0.00000000 | 0.67344900  |
| O | 0.00000000 | 0.00000000 | -0.67344900 |

## REFERENCES

1. E. Corey and W. C. Taylor, *J. Am. Chem. Soc.*, 1964, **86**, 3881-3882.
2. R.-h. Liu, S.-y. Fu, H.-y. Zhan and L. A. Lucia, *Ind. Eng. Chem. Res.*, 2009, **48**, 9331-9334.
